# Supplementary material for: Gas and aerosol carbon in California: comparison of measurements and model predictions in Pasadena and Bakersfield
Source: Copernicus journal article supplement (doi:10.5194/acp-15-5243-2015), 2015-05-12

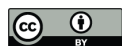

*Supplement of*

**Gas and aerosol carbon in California: comparison of measurements and model predictions in Pasadena and Bakersfield**

**K. R. Baker et al.**

*Correspondence to:* K. R. Baker ([baker.kirk@epa.gov](mailto:baker.kirk@epa.gov))

The copyright of individual parts of the supplement might differ from the CC-BY 3.0 licence.

## **Organization of the Supporting Information**

- Additional Tables (pages 2-5)
- Additional Figures (pages 6-20)
- Sampling Analysis and Methods (pages 21-22)
- CMAQ AE6 treatment for SOA presented by volatility and O:C ratio (pages 23-27)

**Table S1a.** Episode total emissions (tons) of primarily emitted PM2.5 organic carbon by area delineated by source classification code (SCC). The Los Angeles (LA) total includes Los Angeles and Orange counties. The southern San Joaquin Valley (SSJV) total includes Kern, Fresno, Kings, and Tulare counties. Only categories above 1% contribution shown.

| Area | Tons  | Percent | SCC7    | SCC7 Description                                                                                               |
|------|-------|---------|---------|----------------------------------------------------------------------------------------------------------------|
| SSJV | 72.0  | 17.4    | 2302002 | Industrial Processes;Food and Kindred Products: SIC 20;Commercial Cooking - Charbroiling                       |
| SSJV | 54.1  | 13.1    | 2104008 | Stationary Source Fuel Combustion;Residential;Wood                                                             |
| SSJV | 49.3  | 11.9    | 2801500 | Miscellaneous Area Sources;Agriculture Production - Crops;Agricultural Field Burning - whole field set on fire |
| SSJV | 28.4  | 6.9     | 310004  | Industrial Processes;Oil and Gas Production;Process Heaters                                                    |
| SSJV | 25.4  | 6.1     | 2230074 | Mobile Sources;Highway Vehicles - Diesel;Heavy Duty Diesel Vehicles (HDDV) Class 8A & 8B                       |
| SSJV | 14.7  | 3.5     | 2201001 | Mobile Sources;Highway Vehicles - Gasoline;Light Duty Gasoline Vehicles (LDGV)                                 |
| SSJV | 13.5  | 3.3     | 2294000 | Mobile Sources;Paved Roads;All Paved Roads                                                                     |
| SSJV | 12.9  | 3.1     | 2282005 | Mobile Sources;Pleasure Craft;Gasoline 2-Stroke                                                                |
| SSJV | 12.9  | 3.1     | 101009  | External Combustion Boilers;Electric Generation;Wood/Bark Waste                                                |
| SSJV | 11.3  | 2.7     | 202002  | Internal Combustion Engines;Industrial;Natural Gas                                                             |
| SSJV | 10.5  | 2.5     | 2201020 | Mobile Sources;Highway Vehicles - Gasoline;Light Duty Gasoline Trucks 1 & 2 (M6) = LDGT1 (M5)                  |
| SSJV | 8.9   | 2.1     | 305006  | Industrial Processes;Mineral Products;Cement Manufacturing (Dry Process)                                       |
| SSJV | 8.8   | 2.1     | 2230073 | Mobile Sources;Highway Vehicles - Diesel;Heavy Duty Diesel Vehicles (HDDV) Class 6 & 7                         |
| SSJV | 6.2   | 1.5     | 2265003 | Mobile Sources;Off-highway Vehicle Gasoline, 4-Stroke;Industrial Equipment                                     |
| SSJV | 6.0   | 1.4     | 2610000 | Waste Disposal, Treatment, and Recovery;Open Burning;All Categories                                            |
| SSJV | 5.4   | 1.3     | 2296000 | Mobile Sources;Unpaved Roads;All Unpaved Roads                                                                 |
| SSJV | 5.4   | 1.3     | 2201040 | Mobile Sources;Highway Vehicles - Gasoline;Light Duty Gasoline Trucks 3 & 4 (M6) = LDGT2 (M5)                  |
| LA   | 269.4 | 26.8    | 2302002 | Industrial Processes;Food and Kindred Products: SIC 20;Commercial Cooking - Charbroiling                       |
| LA   | 95.9  | 9.5     | 2282005 | Mobile Sources;Pleasure Craft;Gasoline 2-Stroke                                                                |
| LA   | 94.0  | 9.4     | 2201001 | Mobile Sources;Highway Vehicles - Gasoline;Light Duty Gasoline Vehicles (LDGV)                                 |
| LA   | 82.7  | 8.2     | 2104008 | Stationary Source Fuel Combustion;Residential;Wood                                                             |
| LA   | 66.6  | 6.6     | 2307000 | Industrial Processes;Wood Products: SIC 24;All Processes                                                       |
| LA   | 58.0  | 5.8     | 2201020 | Mobile Sources;Highway Vehicles - Gasoline;Light Duty Gasoline Trucks 1 & 2 (M6) = LDGT1 (M5)                  |
| LA   | 38.4  | 3.8     | 2230074 | Mobile Sources;Highway Vehicles - Diesel;Heavy Duty Diesel Vehicles (HDDV) Class 8A & 8B                       |
| LA   | 29.9  | 3.0     | 2201040 | Mobile Sources;Highway Vehicles - Gasoline;Light Duty Gasoline Trucks 3 & 4 (M6) = LDGT2 (M5)                  |
| LA   | 23.8  | 2.4     | 2104006 | Stationary Source Fuel Combustion;Residential;Natural Gas                                                      |
| LA   | 17.5  | 1.7     | 2103008 | Stationary Source Fuel Combustion;Commercial/Institutional;Wood                                                |
| LA   | 15.0  | 1.5     | 2230073 | Mobile Sources;Highway Vehicles - Diesel;Heavy Duty Diesel Vehicles (HDDV) Class 6 & 7                         |
| LA   | 13.6  | 1.4     | 2294000 | Mobile Sources;Paved Roads;All Paved Roads                                                                     |
| LA   | 12.0  | 1.2     | 2302080 | Industrial Processes;Food and Kindred Products: SIC 20;Miscellaneous Food and Kindred Products                 |
| LA   | 10.8  | 1.1     | 2265004 | Mobile Sources;Off-highway Vehicle Gasoline, 4-Stroke;Lawn and Garden Equipment                                |
| LA   | 10.7  | 1.1     | 2265006 | Mobile Sources;Off-highway Vehicle Gasoline, 4-Stroke;Commercial Equipment                                     |

**Table S1b.** Episode total emissions (tons) of the sum of benzene, toluene, and xylenes by area delineated by source classification code (SCC). The Los Angeles (LA) total includes Los Angeles and Orange counties. The southern San Joaquin Valley (SSJV) total includes Kern, Fresno, Kings, and Tulare counties. Only categories above 1% contribution shown.

| Area | Tons  | Percent | SCC7    | SCC7 Description                                                                                                         |
|------|-------|---------|---------|--------------------------------------------------------------------------------------------------------------------------|
| SSJV | 112.3 | 12.8    | 2201001 | Mobile Sources;Highway Vehicles - Gasoline;Light Duty Gasoline Vehicles (LDGV)                                           |
| SSJV | 81.1  | 9.2     | 2201020 | Mobile Sources;Highway Vehicles - Gasoline;Light Duty Gasoline Trucks 1 & 2 (M6) = LDGT1 (M5)                            |
| SSJV | 71.3  | 8.1     | 2680001 | Waste Disposal, Treatment, and Recovery;Composting;100% Biosolids (e.g., sewage sludge, manure, mixtures of these matls) |
| SSJV | 44.2  | 5.0     | 2440000 | Solvent Utilization;Miscellaneous Industrial;All Processes                                                               |
| SSJV | 41.8  | 4.8     | 2201040 | Mobile Sources;Highway Vehicles - Gasoline;Light Duty Gasoline Trucks 3 & 4 (M6) = LDGT2 (M5)                            |
| SSJV | 35.7  | 4.1     | 2460000 | Solvent Utilization;Miscellaneous Non-industrial: Consumer and Commercial;All Processes                                  |
| SSJV | 32.5  | 3.7     | 2282005 | Mobile Sources;Pleasure Craft;Gasoline 2-Stroke                                                                          |
| SSJV | 31.9  | 3.6     | 2265004 | Mobile Sources;Off-highway Vehicle Gasoline, 4-Stroke;Lawn and Garden Equipment                                          |
| SSJV | 31.5  | 3.6     | 2310010 | Industrial Processes;Oil and Gas Production: SIC 13;Crude Petroleum                                                      |
| SSJV | 30.6  | 3.5     | 2620030 | Waste Disposal, Treatment, and Recovery;Landfills;Municipal                                                              |
| SSJV | 27.6  | 3.1     | 2261500 | Mobile Sources;Off-highway Vehicle Gasoline, 4-Stroke;Recreational Equipment                                             |
| SSJV | 25.6  | 2.9     | 309010  | Industrial Processes;Fabricated Metal Products;Electroplating Operations                                                 |
| SSJV | 20.6  | 2.4     | 2282010 | Mobile Sources;Pleasure Craft;Gasoline 4-Stroke                                                                          |
| SSJV | 16.5  | 1.9     | 2401002 | Solvent Utilization;Surface Coating;Architectural Coatings - Solvent-based                                               |
| SSJV | 15.1  | 1.7     | 2201070 | Mobile Sources;Highway Vehicles - Gasoline;Heavy Duty Gasoline Vehicles 2B thru 8B & Buses (HDGV)                        |
| SSJV | 14.8  | 1.7     | 2265005 | Mobile Sources;Off-highway Vehicle Gasoline, 4-Stroke;Agricultural Equipment                                             |
| SSJV | 14.7  | 1.7     | 2401005 | Solvent Utilization;Surface Coating;Auto Refinishing: SIC 7532                                                           |
| SSJV | 14.6  | 1.7     | 2401020 | Solvent Utilization;Surface Coating;Wood Furniture: SIC 25                                                               |
| SSJV | 12.0  | 1.4     | 2801500 | Miscellaneous Area Sources;Agriculture Production - Crops;Agricultural Field Burning - whole field set on fire           |
| SSJV | 11.3  | 1.3     | 2265003 | Mobile Sources;Off-highway Vehicle Gasoline, 4-Stroke;Industrial Equipment                                               |
| SSJV | 10.9  | 1.2     | 2260004 | Mobile Sources;Off-highway Vehicle Gasoline, 2-Stroke;Lawn and Garden Equipment                                          |
| SSJV | 10.6  | 1.2     | 2230074 | Mobile Sources;Highway Vehicles - Diesel;Heavy Duty Diesel Vehicles (HDDV) Class 8A & 8B                                 |
| SSJV | 10.3  | 1.2     | 2415300 | Solvent Utilization;Degreasing;All Industries: Cold Cleaning                                                             |
| SSJV | 10.1  | 1.2     | 2265006 | Mobile Sources;Off-highway Vehicle Gasoline, 4-Stroke;Commercial Equipment                                               |
| SSJV | 10.1  | 1.2     | 2460500 | Solvent Utilization;Miscellaneous Non-industrial: Consumer and Commercial;All Coatings and Related Products              |
| SSJV | 9.5   | 1.1     | 2501011 | Storage and Transport;Petroleum and Petroleum Product Storage;Residential Portable Gas Cans                              |
| SSJV | 9.2   | 1.0     | 2201080 | Mobile Sources;Highway Vehicles - Gasoline;Motorcycles (MC)                                                              |
| LA   | 546.0 | 15.9    | 2201001 | Mobile Sources;Highway Vehicles - Gasoline;Light Duty Gasoline Vehicles (LDGV)                                           |
| LA   | 345.8 | 10.1    | 2201020 | Mobile Sources;Highway Vehicles - Gasoline;Light Duty Gasoline Trucks 1 & 2 (M6) = LDGT1 (M5)                            |
| LA   | 244.8 | 7.1     | 2265004 | Mobile Sources;Off-highway Vehicle Gasoline, 4-Stroke;Lawn and Garden Equipment                                          |
| LA   | 207.7 | 6.0     | 2282005 | Mobile Sources;Pleasure Craft;Gasoline 2-Stroke                                                                          |
| LA   | 201.2 | 5.9     | 2460000 | Solvent Utilization;Miscellaneous Non-industrial: Consumer and Commercial;All Processes                                  |
| LA   | 178.1 | 5.2     | 2201040 | Mobile Sources;Highway Vehicles - Gasoline;Light Duty Gasoline Trucks 3 & 4 (M6) = LDGT2 (M5)                            |
| LA   | 114.0 | 3.3     | 2401050 | Solvent Utilization;Surface Coating;Miscellaneous Finished Metals: SIC 34 - (341 + 3498)                                 |
| LA   | 106.8 | 3.1     | 2282010 | Mobile Sources;Pleasure Craft;Gasoline 4-Stroke                                                                          |
| LA   | 104.9 | 3.0     | 2620030 | Waste Disposal, Treatment, and Recovery;Landfills;Municipal                                                              |
| LA   | 88.2  | 2.6     | 2260004 | Mobile Sources;Off-highway Vehicle Gasoline, 2-Stroke;Lawn and Garden Equipment                                          |
| LA   | 84.1  | 2.4     | 2401005 | Solvent Utilization;Surface Coating;Auto Refinishing: SIC 7532                                                           |
| LA   | 74.4  | 2.2     | 2265006 | Mobile Sources;Off-highway Vehicle Gasoline, 4-Stroke;Commercial Equipment                                               |
| LA   | 70.6  | 2.1     | 2401090 | Solvent Utilization;Surface Coating;Miscellaneous Manufacturing                                                          |
| LA   | 70.1  | 2.0     | 2460500 | Solvent Utilization;Miscellaneous Non-industrial: Consumer and Commercial;All Coatings and Related Products              |
| LA   | 69.1  | 2.0     | 2415300 | Solvent Utilization;Degreasing;All Industries: Cold Cleaning                                                             |
| LA   | 63.3  | 1.8     | 2201070 | Mobile Sources;Highway Vehicles - Gasoline;Heavy Duty Gasoline Vehicles 2B thru 8B & Buses (HDGV)                        |
| LA   | 58.7  | 1.7     | 306888  | Industrial Processes;Petroleum Industry;Fugitive Emissions                                                               |
| LA   | 56.5  | 1.6     | 2401025 | Solvent Utilization;Surface Coating;Metal Furniture: SIC 25                                                              |
| LA   | 55.9  | 1.6     | 2501011 | Storage and Transport;Petroleum and Petroleum Product Storage;Residential Portable Gas Cans                              |
| LA   | 41.8  | 1.2     | 2440000 | Solvent Utilization;Miscellaneous Industrial;All Processes                                                               |
| LA   | 40.4  | 1.2     | 2401040 | Solvent Utilization;Surface Coating;Metal Cans: SIC 341                                                                  |
| LA   | 39.8  | 1.2     | 2265003 | Mobile Sources;Off-highway Vehicle Gasoline, 4-Stroke;Industrial Equipment                                               |
| LA   | 39.5  | 1.1     | 2401070 | Solvent Utilization;Surface Coating;Motor Vehicles: SIC 371                                                              |
| LA   | 38.7  | 1.1     | 2201080 | Mobile Sources;Highway Vehicles - Gasoline;Motorcycles (MC)                                                              |
| LA   | 36.9  | 1.1     | 2265001 | Mobile Sources;Off-highway Vehicle Gasoline, 4-Stroke;Recreational Equipment                                             |

**Table S2a.** Matching grouped measured and modeled PM2.5 species. Measured SOC contributions estimated by dividing the total tracer concentration by group with a photochemical reaction chamber derived SOC mass fraction for the same group.

| Species                 | Measured Species                                                                                                                                                                           | CMAQ Model Species                                                                                                                                                                                                                          |
|-------------------------|--------------------------------------------------------------------------------------------------------------------------------------------------------------------------------------------|---------------------------------------------------------------------------------------------------------------------------------------------------------------------------------------------------------------------------------------------|
| PM2.5 Elemental Carbon  | EC                                                                                                                                                                                         | AECI + AECJ                                                                                                                                                                                                                                 |
| PM2.5 Organic Carbon    | OC                                                                                                                                                                                         | (AXYL1J + AXYL2J + AXYL3J)/2.0 + (ATOL1J + ATOL2J + ATOL3J)/2.0 + (ABNZ1J + ABNZ2J + ABNZ3J)/2.0 + (AISO1J + AISO2J)/1.6 + AISO3J/2.7 + (ATRP1J + ATRP2J)/1.4 + ASQTJ/2.1 + 0.64*AALKJ + AORGCI/2.0 + (AOLGBJ + AOLGAJ)/2.1 + APOCI + APOCI |
| Isoprene                | (2-methyl erythritol + 2-methyl trietol + 2-methylglyceric acid) * (1/0.063)                                                                                                               | (AISO1J + AISO2J)/1.6 + AISO3J/2.7 + (AOLGBJ/2.1 * iso_fraction)                                                                                                                                                                            |
| Monoterpenes            | (3-acetyl hexanedioic acid + 3-hydroxyglutaric acid + 3-methyl-1,2,3-butanetricarboxylic acid + 3-acetyl pentanedioic acid + Pinic acid + 2-hydroxy-4,4-dimethylglutaric acid) * (1/0.231) | (ATRP1J + ATRP2J)/1.4 + (AOLGBJ/2.1 * trp_fraction)                                                                                                                                                                                         |
| Sesquiterpenes          | (b-caryophellinic acid) * (1/0.023)                                                                                                                                                        | ASQT/2.1 + (AOLGB/2.1 * (1-trp_fraction-iso_fraction))                                                                                                                                                                                      |
| Toluenes + Xylenes      | (2-3-dihydroxy-4-oxo-pentanoic acid) * (1/0.0079)                                                                                                                                          | (ATOL1J + ATOL2J + ATOL3J + AXYL1J + AXYL2J + AXYL3J)/2 + (AOLGAJ/2.1 * (tol+xyl_fraction))                                                                                                                                                 |
| Benzenes                | n/a                                                                                                                                                                                        | (ABNZ1J + ABNZ2J + ABNZ3J)/2 + (AOLGAJ/2.1 * bnz_fraction)                                                                                                                                                                                  |
| Alkanes                 | n/a                                                                                                                                                                                        | AALKJ/1.56 + (AOLGAJ/2.1 * alk_fraction)                                                                                                                                                                                                    |
| Methylglyoxal + glyoxal | n/a                                                                                                                                                                                        | AORGCI/2                                                                                                                                                                                                                                    |
| Napthalene              | (phthalic acid + isophthalic acid) * (1/0.0357)                                                                                                                                            | n/a                                                                                                                                                                                                                                         |

$iso\_fraction = (AISO1J + AISO2J + AISO3J) / (AISO1J + AISO2J + AISO3J + ATRP1J + ATRP2J + ASQT)$   
 $trp\_fraction = (ATRP1J + ATRP2J) / (AISO1J + AISO2J + AISO3J + ATRP1J + ATRP2J + ASQT)$   
 $bnz\_fraction = (ABNZ1J + ABNZ2J + ABNZ3J) / (ATOL1J + ATOL2J + ATOL3J + AXYL1J + AXYL2J + AXYL3J + ABNZ1J + ABNZ2J + ABNZ3J + AALKJ)$   
 $alk\_fraction = (AALKJ) / (ATOL1J + ATOL2J + ATOL3J + AXYL1J + AXYL2J + AXYL3J + ABNZ1J + ABNZ2J + ABNZ3J + AALKJ)$   
 $tol+xyl\_fraction = (ATOL1J + ATOL2J + ATOL3J + AXYL1J + AXYL2J + AXYL3J) / (ATOL1J + ATOL2J + ATOL3J + AXYL1J + AXYL2J + AXYL3J + ABNZ1J + ABNZ2J + ABNZ3J + AALKJ)$

**Table S2b.** Matching grouped measured and modeled VOC species.

| Species                 | Measured Species                                                                                                                                                            | CMAQ Model Species                                                                                                                                                                                                                                                                                                                                                                                                                                         |
|-------------------------|-----------------------------------------------------------------------------------------------------------------------------------------------------------------------------|------------------------------------------------------------------------------------------------------------------------------------------------------------------------------------------------------------------------------------------------------------------------------------------------------------------------------------------------------------------------------------------------------------------------------------------------------------|
| Isoprene                | Isoprene                                                                                                                                                                    | 5*ISOPRENE                                                                                                                                                                                                                                                                                                                                                                                                                                                 |
| Benzenes                | Benzene                                                                                                                                                                     | 6*BENZENE                                                                                                                                                                                                                                                                                                                                                                                                                                                  |
| Monoterpenes            | beta-pinene + alpha-pinene + 2-carene + limonene                                                                                                                            | 10*TERP                                                                                                                                                                                                                                                                                                                                                                                                                                                    |
| Sesquiterpenes          | n/a                                                                                                                                                                         | 15*SESQ                                                                                                                                                                                                                                                                                                                                                                                                                                                    |
| Toluenes                | Toluene + Ethylbenzene + Isopropylbenzene*0.78 + n-                                                                                                                         | 7*TOLUENE                                                                                                                                                                                                                                                                                                                                                                                                                                                  |
| Xylenes                 | m-p xylene + o-xylene + m-ethyltoluene*0.89 + p-ethyltoluene*0.89 + 1,3,5-trimethylbenzene*0.89 + o-ethyltoluene*0.89 + 1,2,4-trimethylbenzene*0.89 + p-diethylbenzene*0.80 | 8*(MXYL + OXYL + PXYL)                                                                                                                                                                                                                                                                                                                                                                                                                                     |
| Ethane                  | Ethane                                                                                                                                                                      | 2*ALK1                                                                                                                                                                                                                                                                                                                                                                                                                                                     |
| Ethene                  | Ethene                                                                                                                                                                      | 2*ETHENE                                                                                                                                                                                                                                                                                                                                                                                                                                                   |
| Formaldehyde            | Formaldehyde                                                                                                                                                                | HCHO                                                                                                                                                                                                                                                                                                                                                                                                                                                       |
| Methanol                | Methanol                                                                                                                                                                    | MEOH                                                                                                                                                                                                                                                                                                                                                                                                                                                       |
| Ethanol                 | Ethanol                                                                                                                                                                     | 2*ETOH                                                                                                                                                                                                                                                                                                                                                                                                                                                     |
| Total VOC (non-methane) | Sum of all measured non-methane VOC species                                                                                                                                 | (3.*ACETONE + 2.*ACETYLENE + 3.*ACROLEIN + 2.*ALK1 + 3.*ALK2 + 4.*ALK3 + 5.*ALK4 + 8.*ALK5 + 8.*ARO1 + 9.*ARO2 + 4.*BACL + 7.*BALD + 6.*BENZENE + 4.*BUTADIENE13 + 2.*CCHO + 2.*CCOOH + 7.*CRES + 2.*ETHENE + 2.*ETOH + 2.*GLY + HCHO + HCOOH + 5.*ISOPRENE + 5.*IPRD + 4.*MEK + MEOH + 4.*MACR + 3.*MGly + 4.*MVK + 5.*OLE1 + 5.*OLE2 + 8.*(PXYL + MXYL + OXYL) + 6.*PRD2 + 3.*PROPENE + 3.*RCHO + 3.*RCOOH + 7.*TOLUENE + 9.*TRIMETH_BENZ124 + 6.0*RNO3) |

**Figure S1.** Model domain and CALNEX monitor locations.

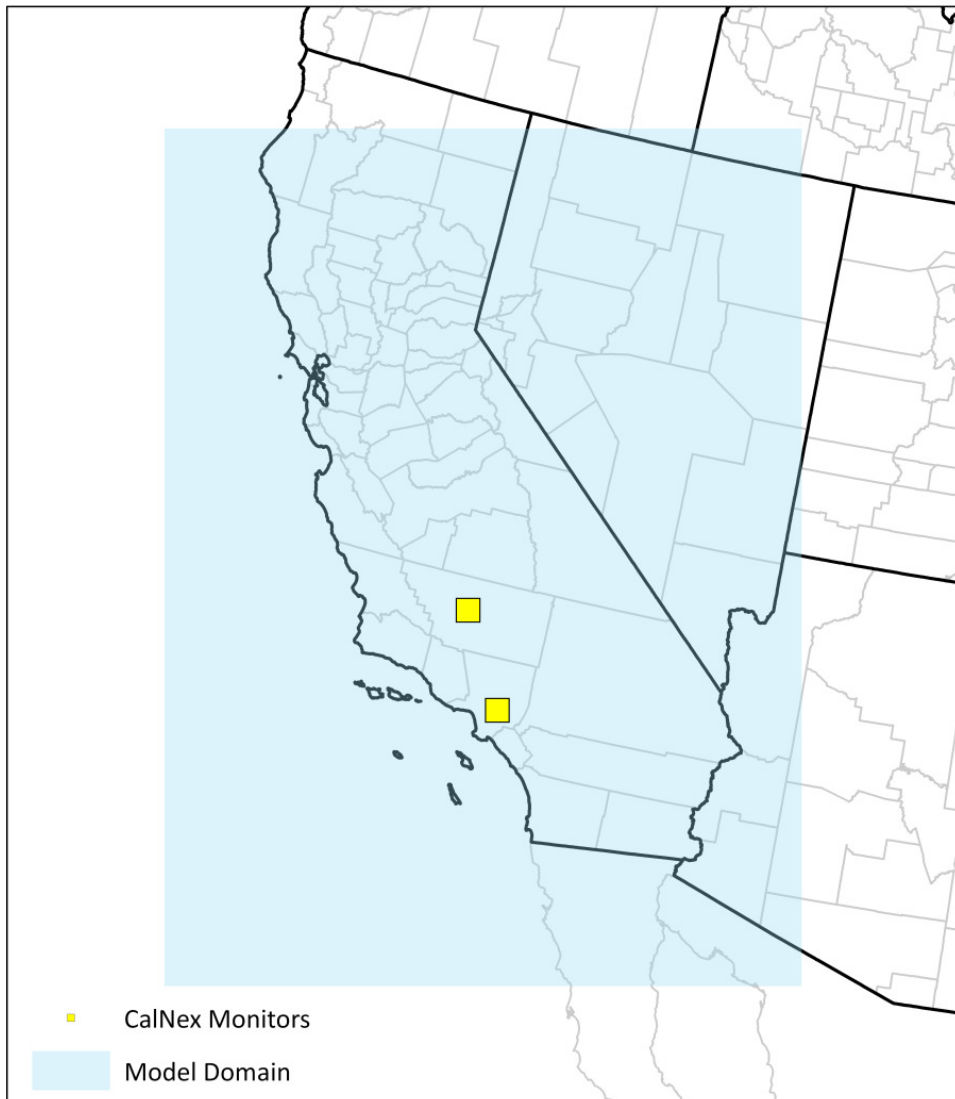

**Figure S2.** CMAQ SOA schematic diagram. Reproduced from Carlton et al., 2010: Carlton, A.G., Bhawe, P.V., Napelenok, S.L., Edney, E.O., Sarwar, G., Pinder, R.W., Pouliot, G.A., Houyoux, M., 2010. Treatment of secondary organic aerosol in CMAQv4.7. *Environmental Science and Technology* 44, 8553-8560.

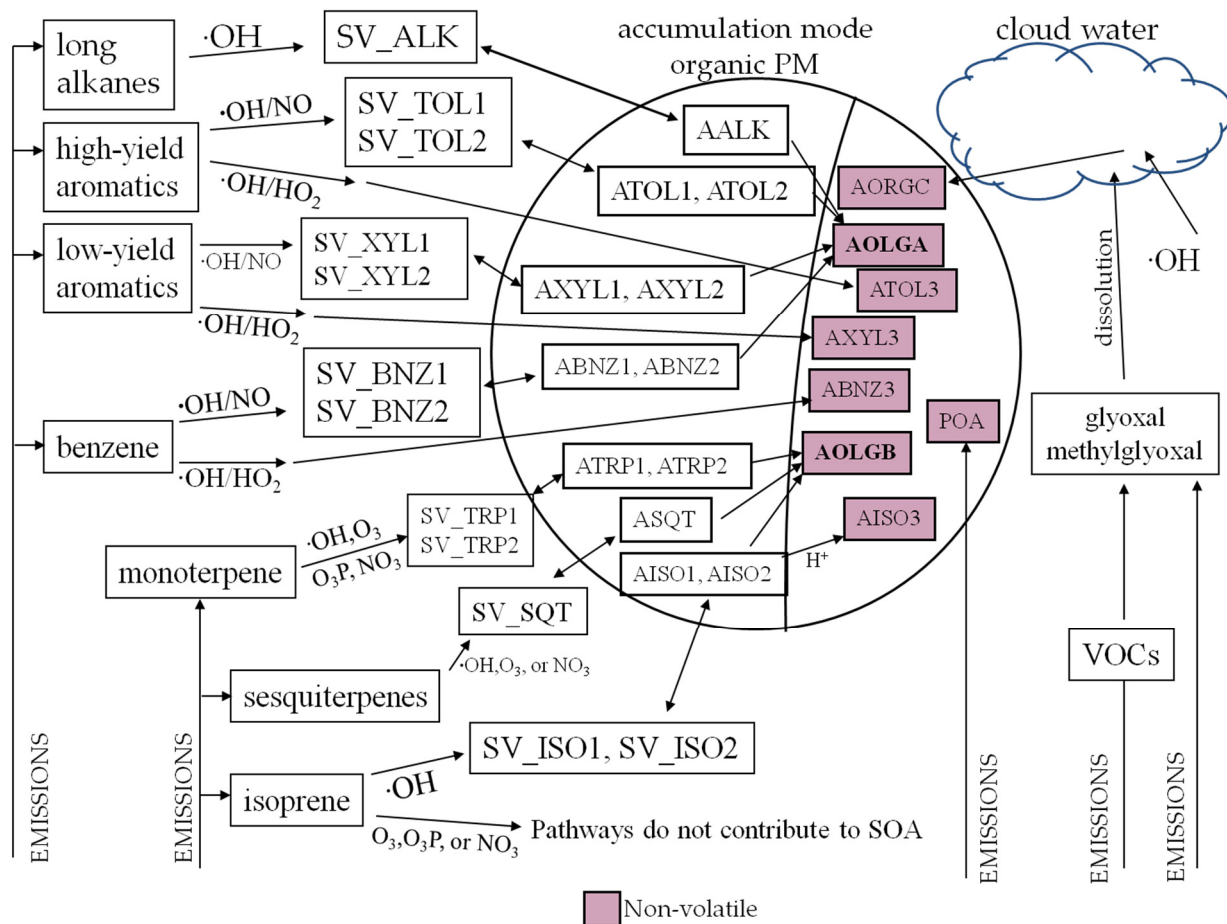



**Figure S3a.** Bakersfield CALNEX site and nearby CSN location.

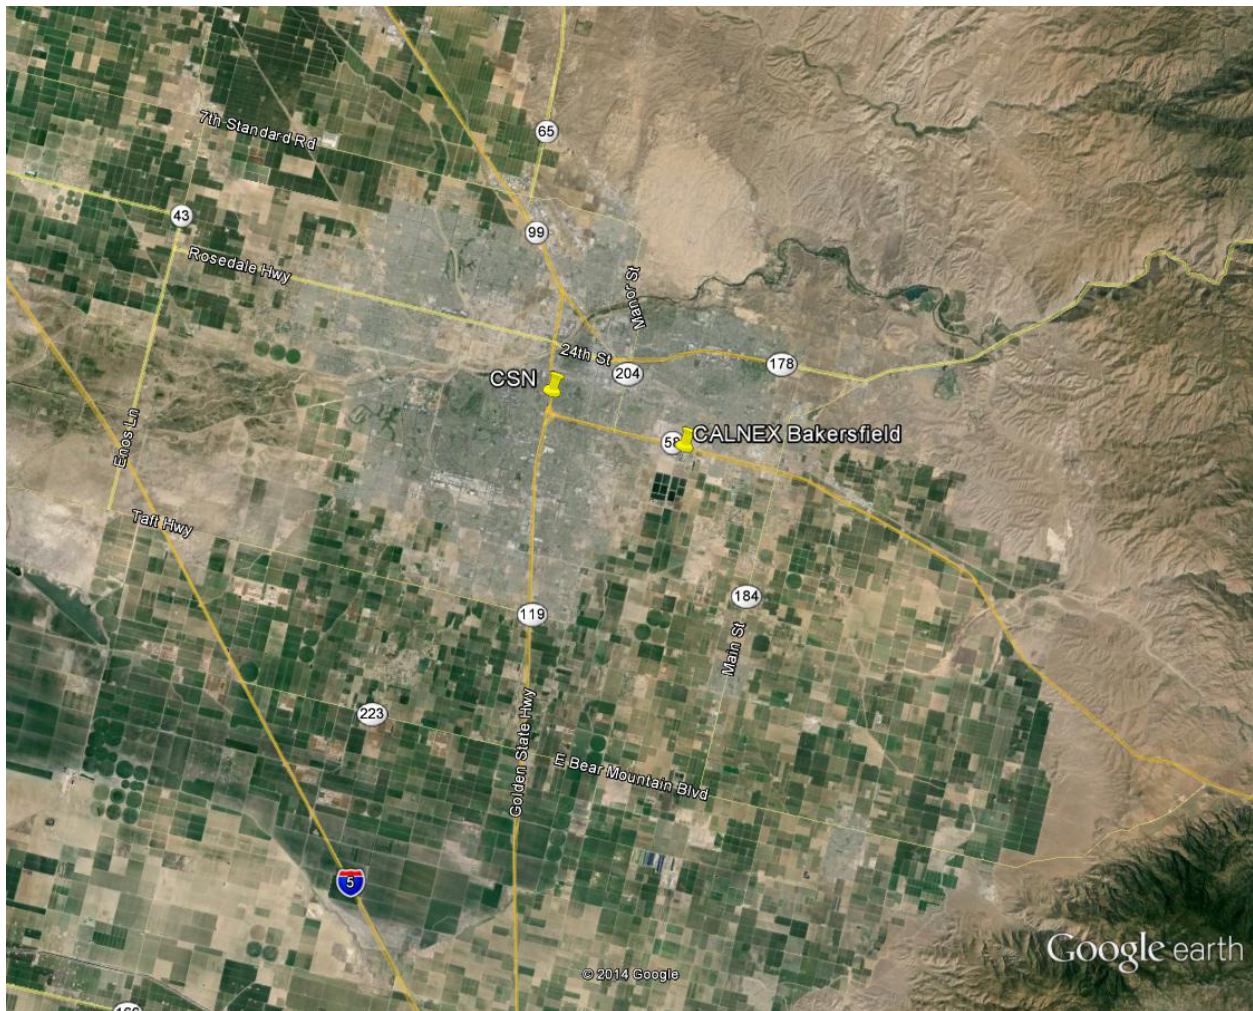



**Figure S3b.** Pasadena CALNEX site and nearby CSN location.

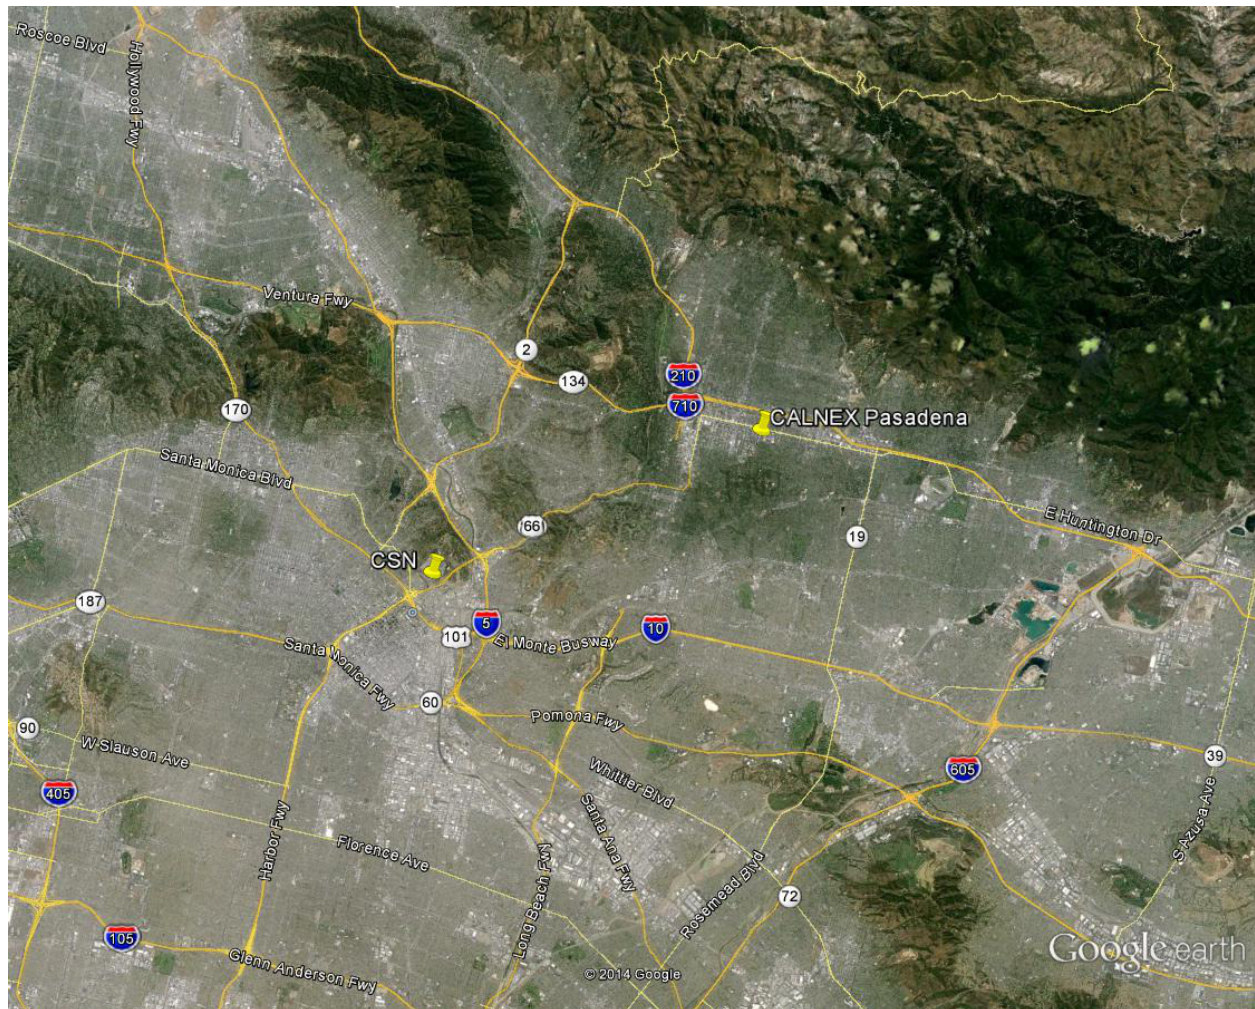

**Figure S4a.** Observed daily average temperature (F) compared with daily average PM2.5 fossil carbon, PM2.5 contemporary carbon, PM2.5 organic carbon, and PM2.5 elemental carbon at Pasadena. Concentrations shown are in units  $\mu\text{gC}/\text{m}^3$ .

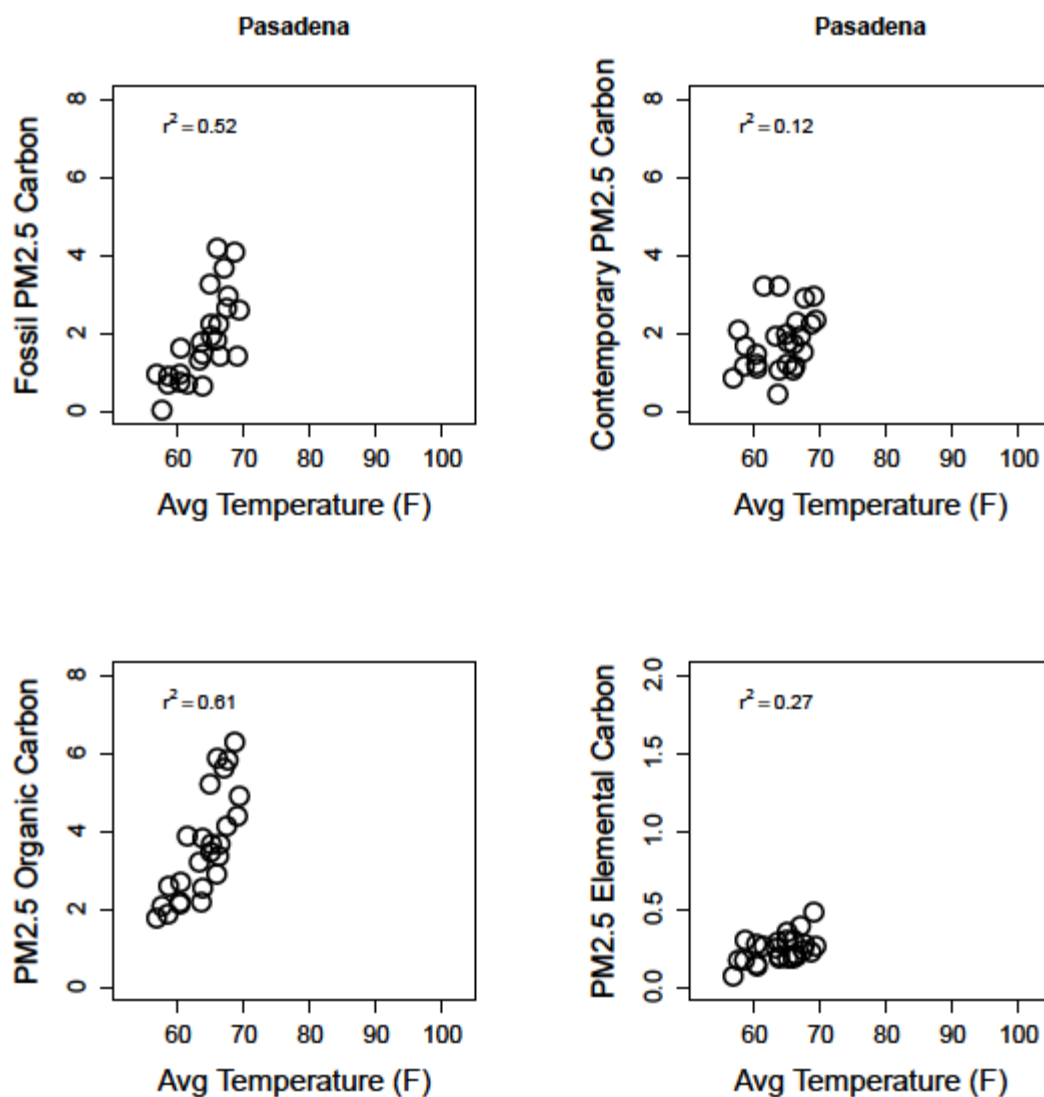

**Figure S4b.** Observed daily average temperature (F) compared with daily average PM2.5 fossil carbon, PM2.5 contemporary carbon, PM2.5 organic carbon, and PM2.5 elemental carbon at Bakersfield. Concentrations shown are in units  $\mu\text{gC}/\text{m}^3$ .

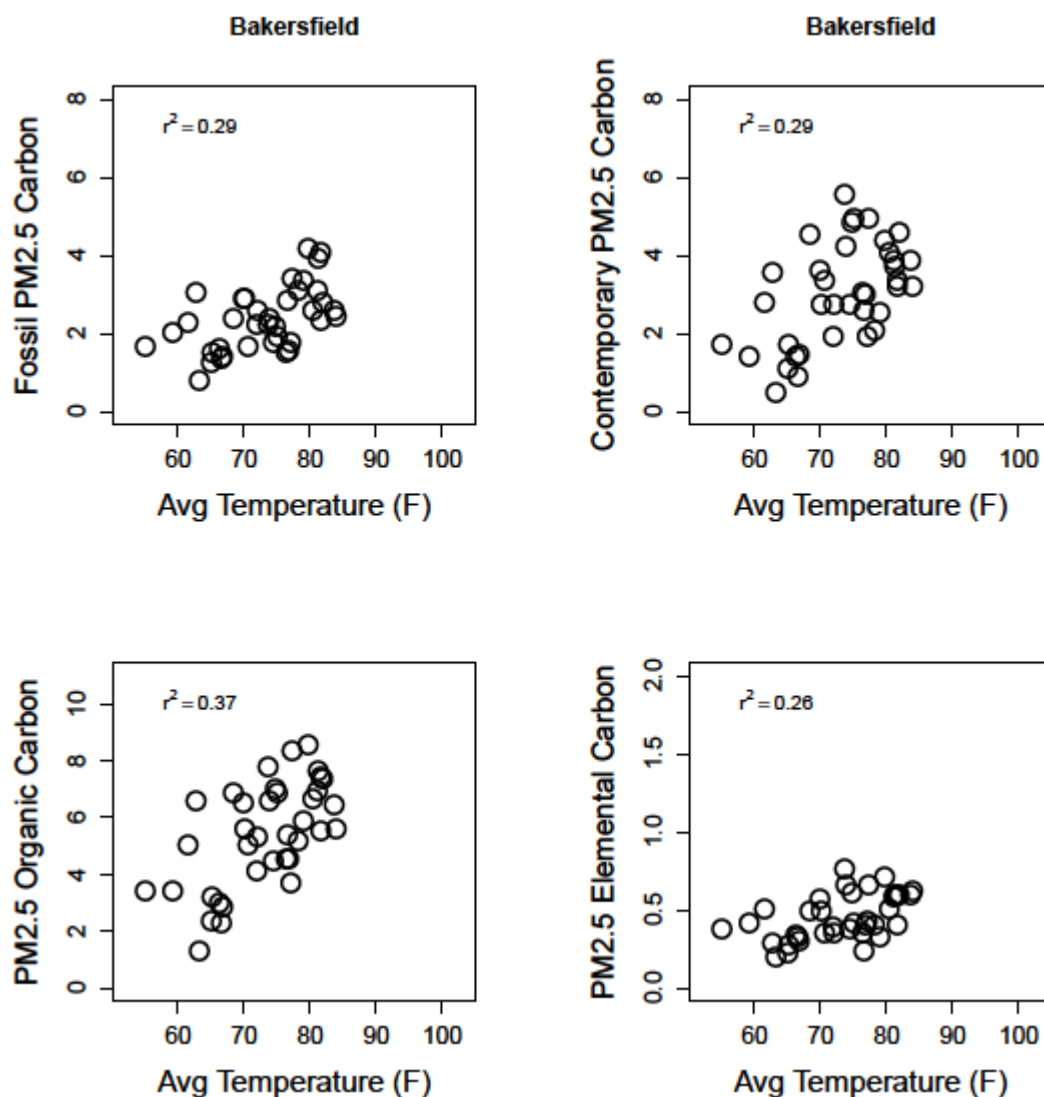

**Figure S5.** Observed contemporary carbon fraction, PM2.5 contemporary carbon, PM2.5 fossil carbon, and PM2.5 elemental carbon by day of the week for Pasadena and Bakersfield.

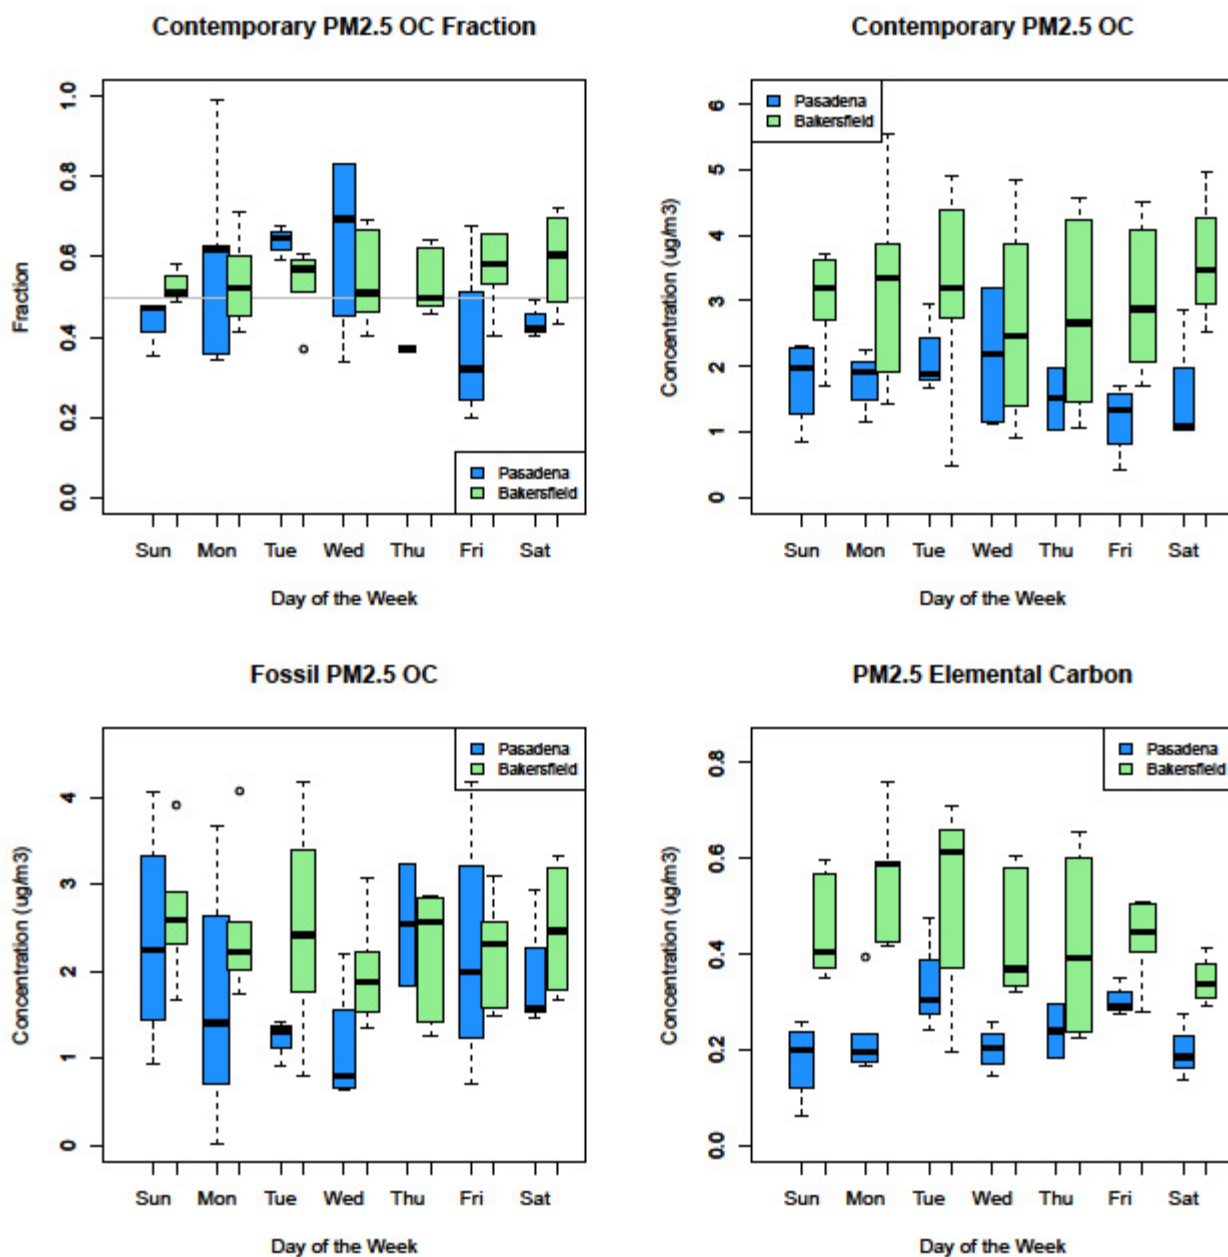

**Figure S6.** Measured and model estimated contemporary PM2.5 OC fraction at Pasadena and Bakersfield.

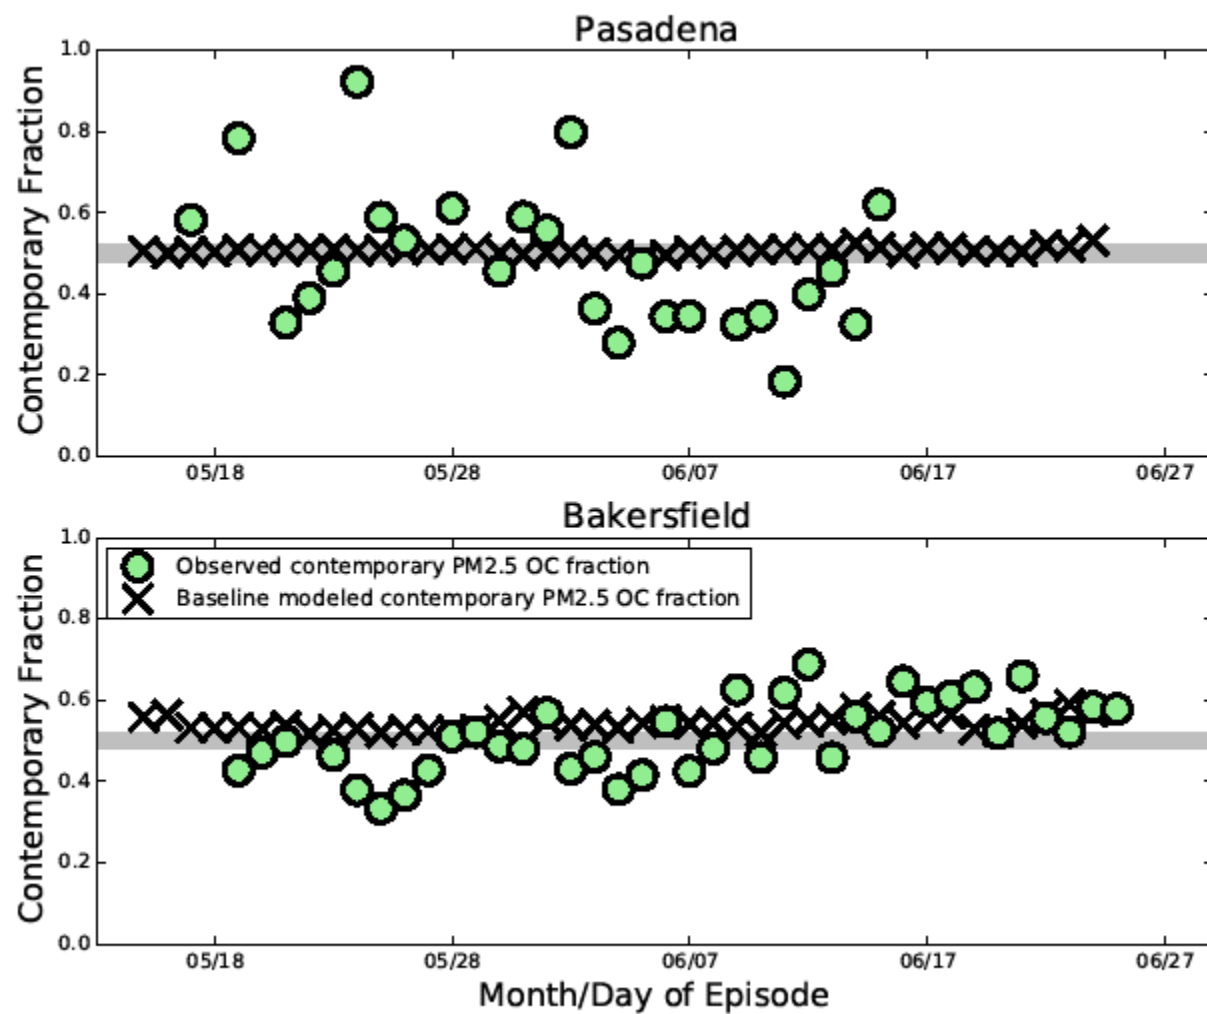

**Figure S7.** Model predicted and measured PM<sub>2.5</sub> elemental carbon at Pasadena and Bakersfield.

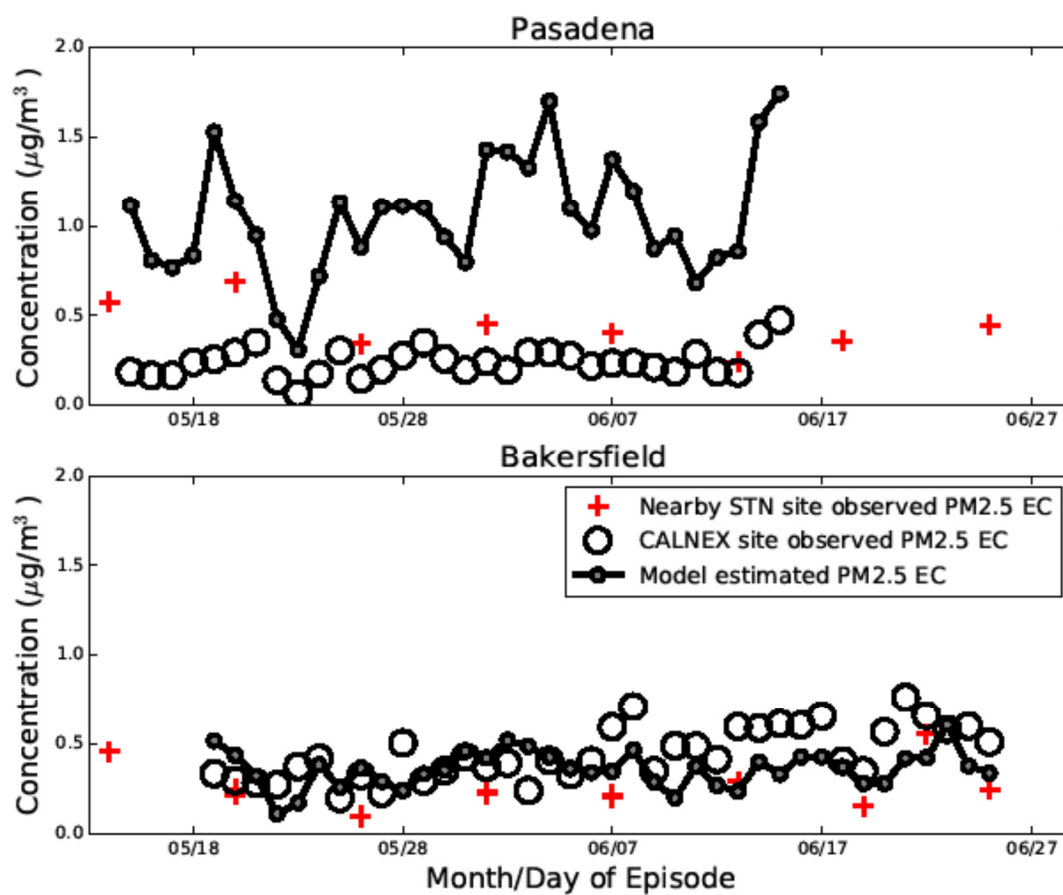



**Figure S8.** Model and observed hourly VOC (and CO) paired in time and space.

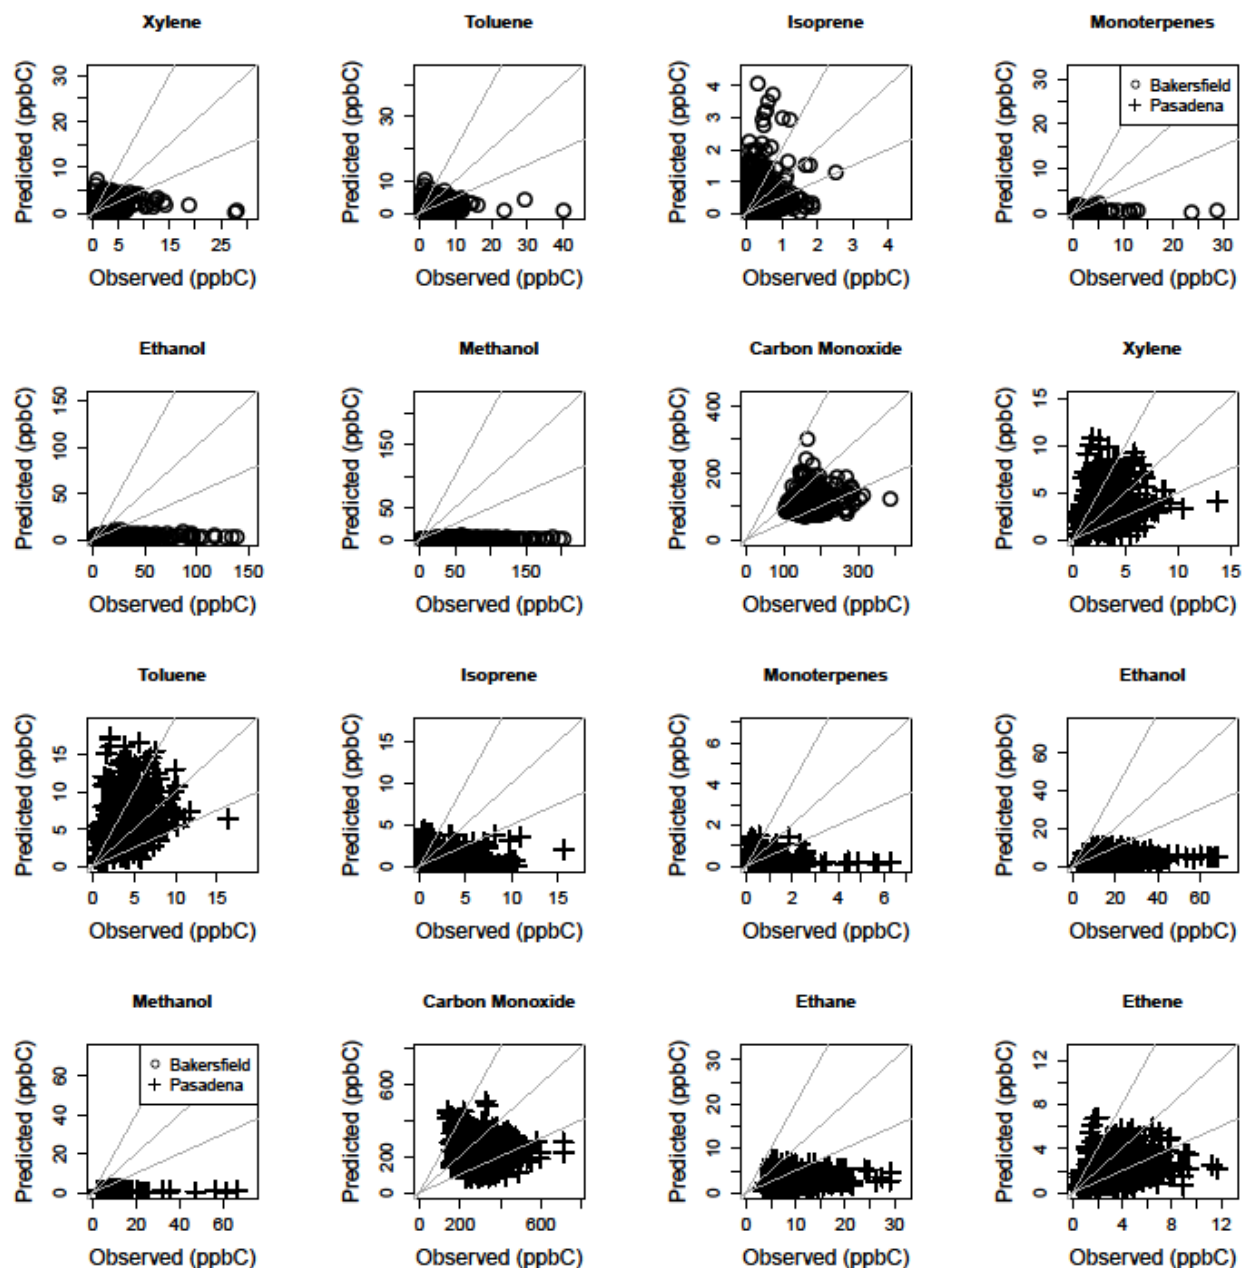



**Figure S9.** Model and observed mid-morning 3 hour average VOC paired in time and space.

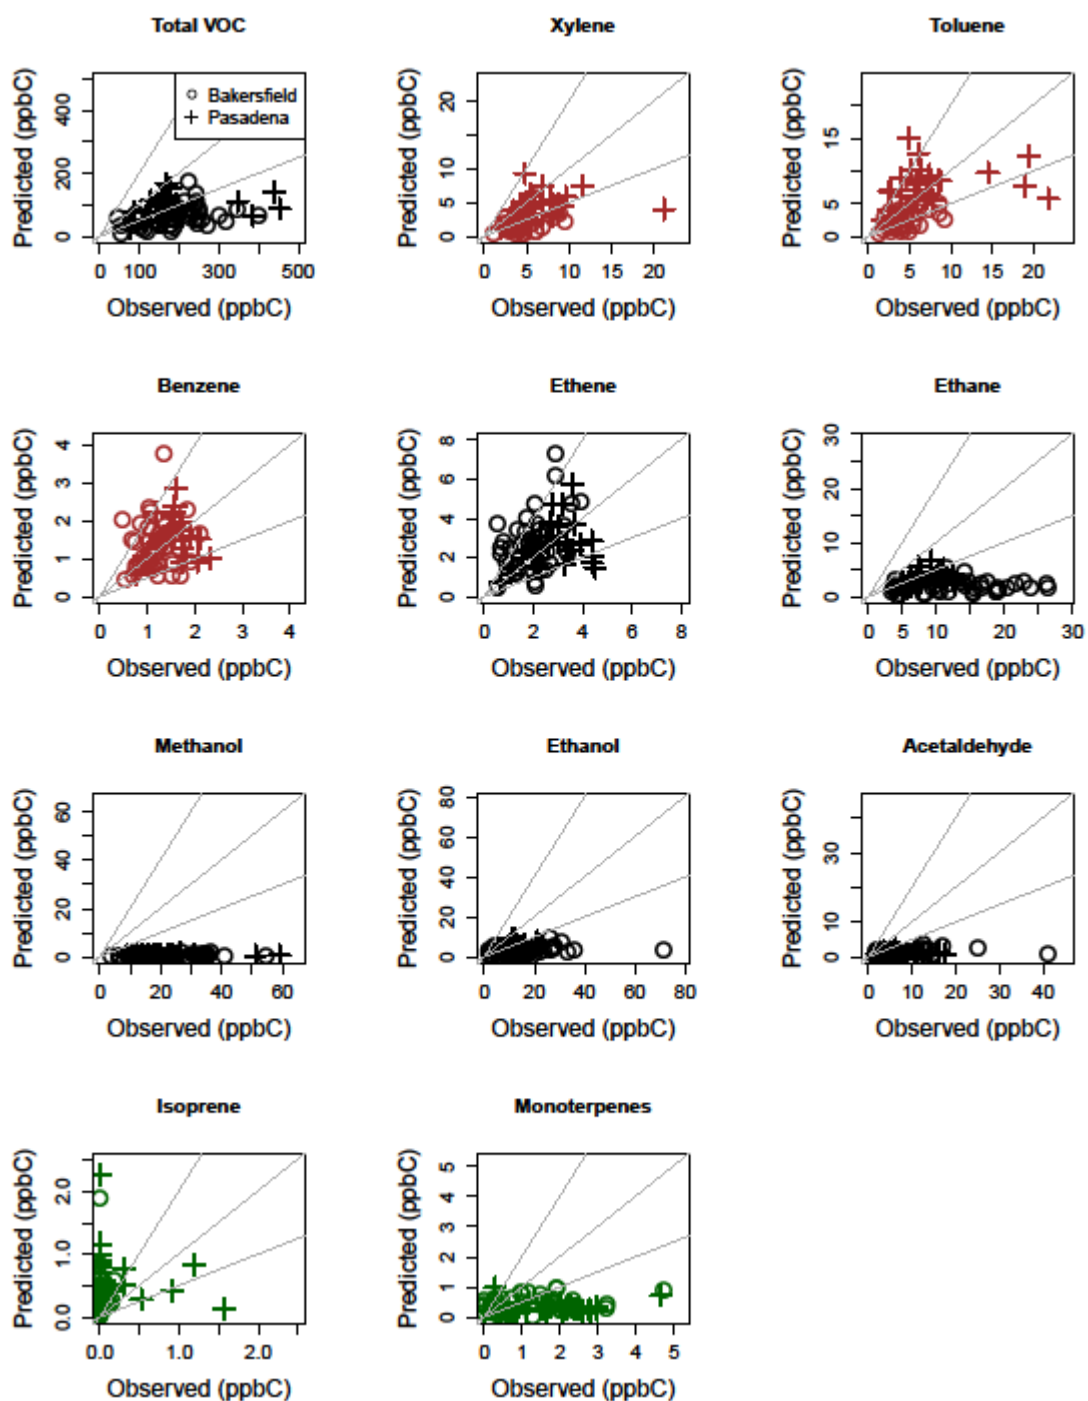

**Figure S10a.** June average model estimates.

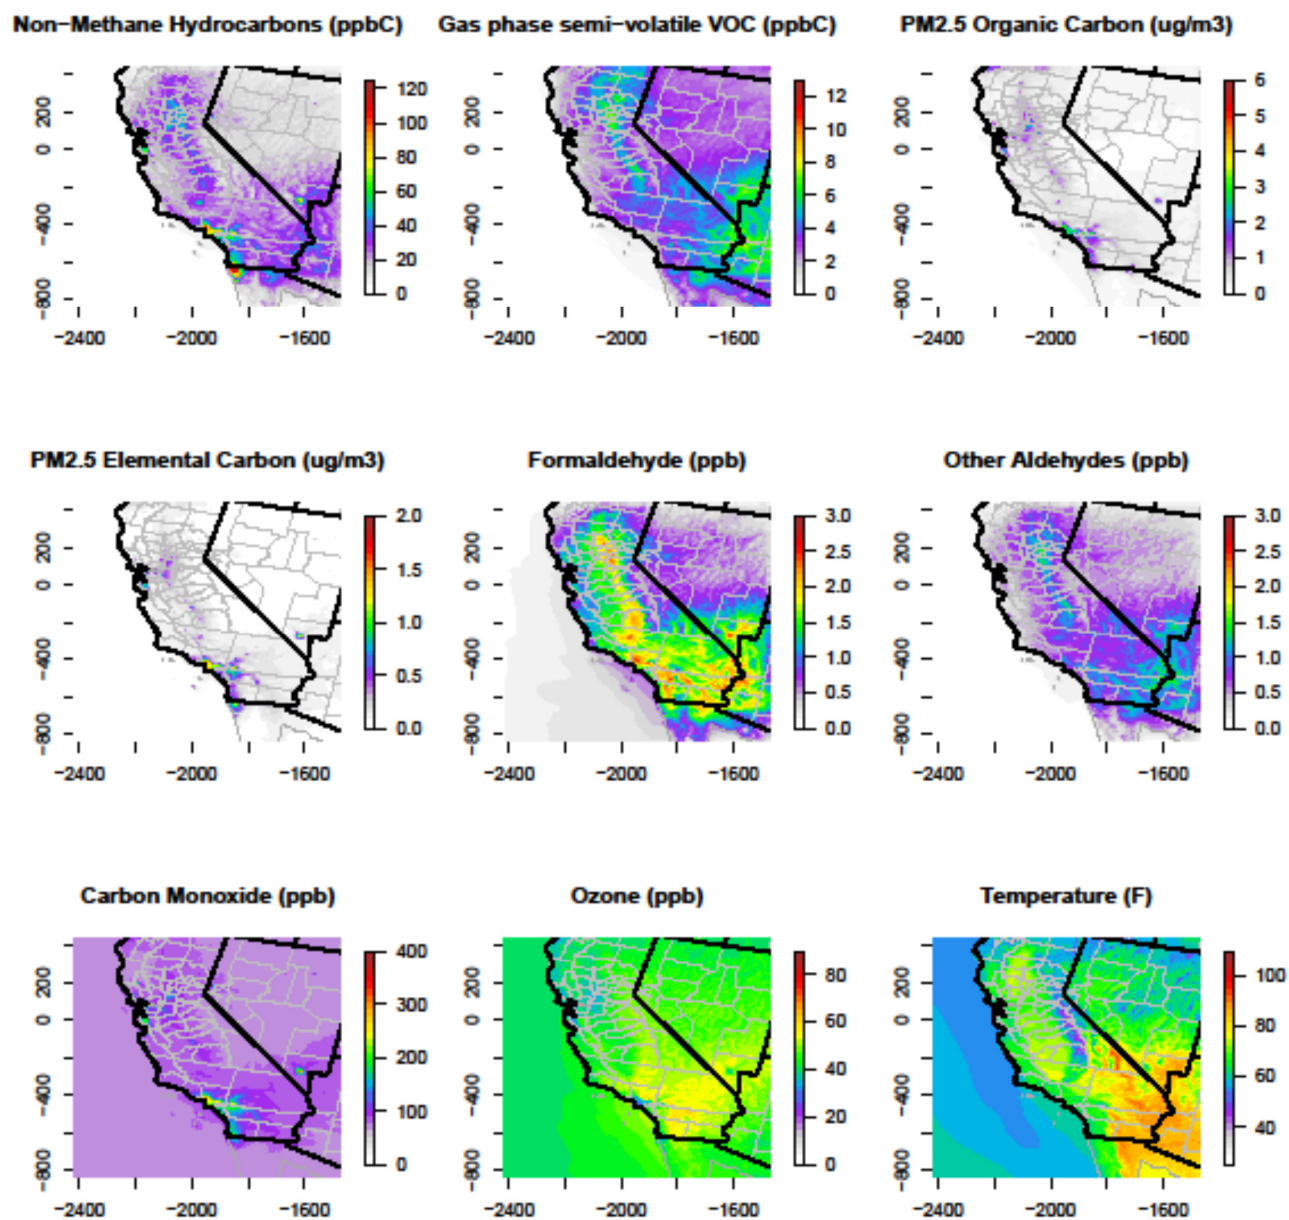

**Figure S10b.** June average model estimates. Biogenic VOC, semi-volatile products, and SOA.

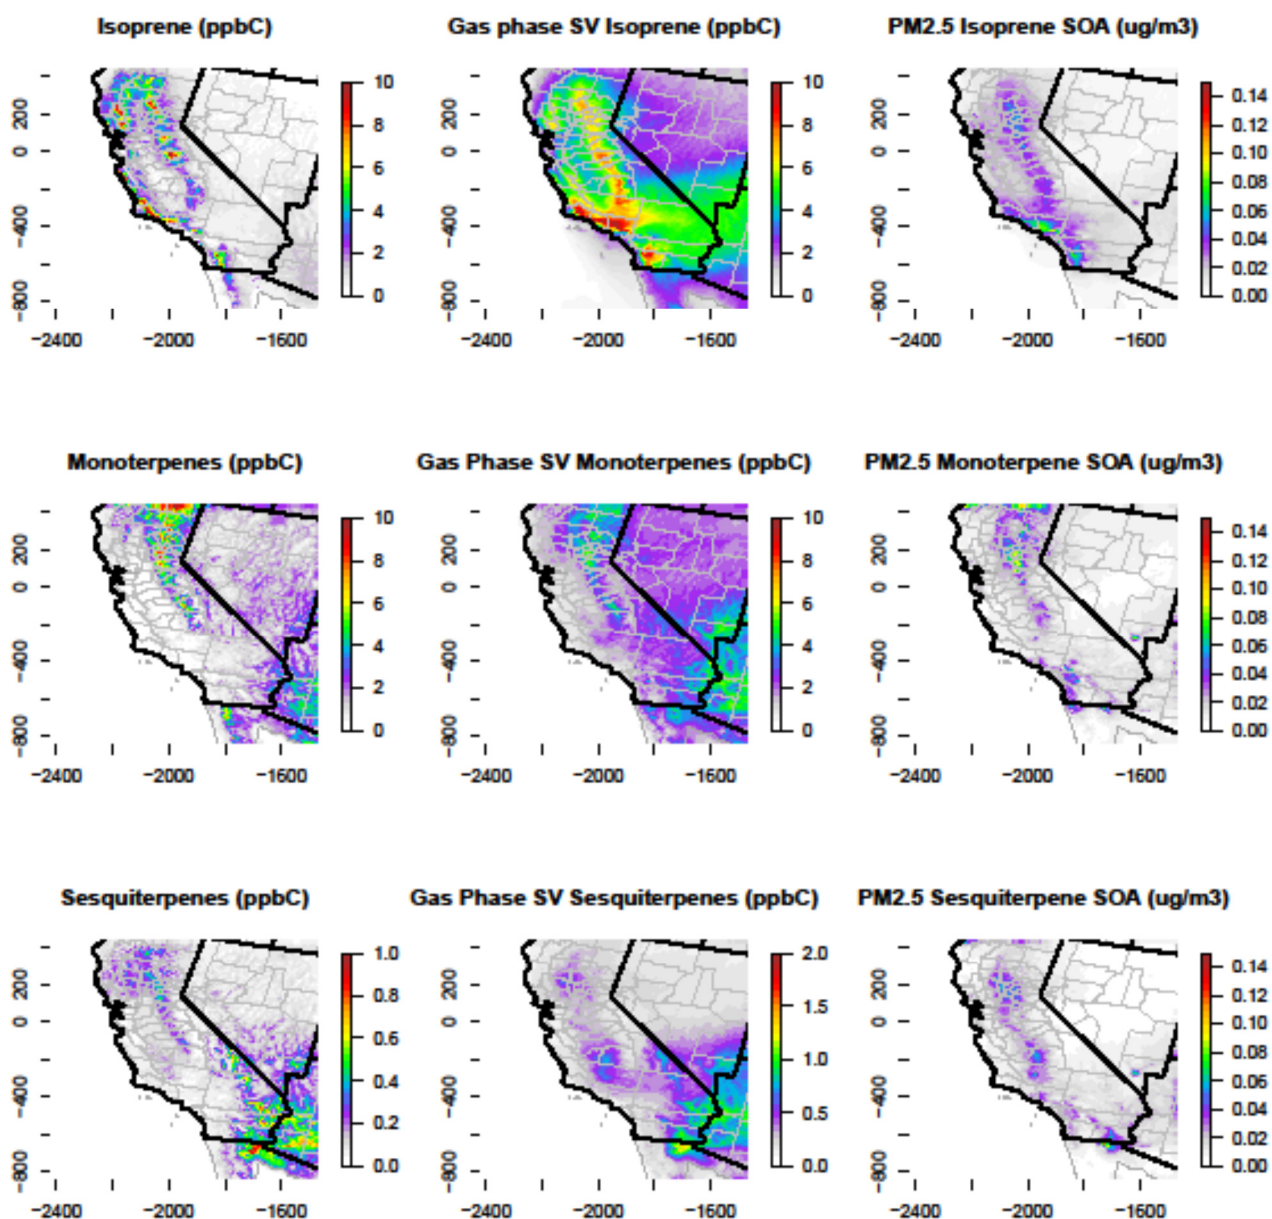

**Figure S10c.** June average model estimates. Anthropogenic VOC, semi-volatile products, and SOA.

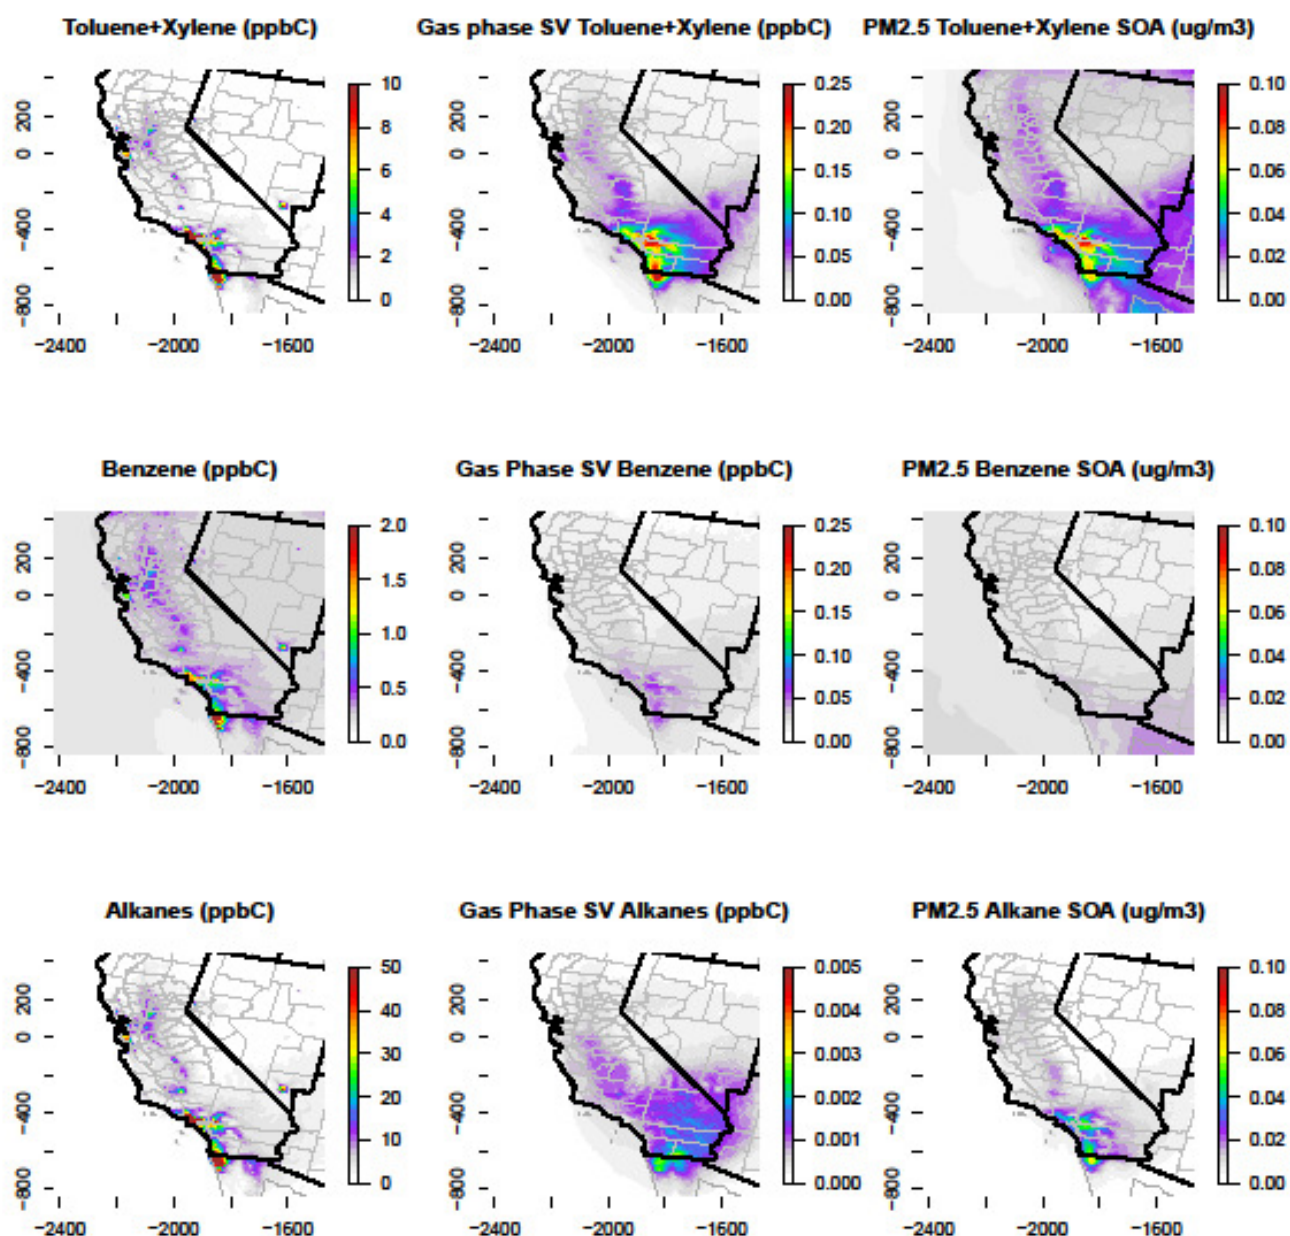



**Figure S11.** Episode average baseline (top row) and sensitivity (bottom row) model bias and error for PM<sub>2.5</sub> organic carbon at CSN (circles) and IMPROVE (squares) sites. The large underestimate at the location in northeast California is related to model underestimates of elevated concentrations during a cold period in this area which may have resulted in increased residential fuel combustion. In general, the model underestimates organic carbon, most notably in urban areas. Rural areas dominated by biogenic sources show minimal bias and error.

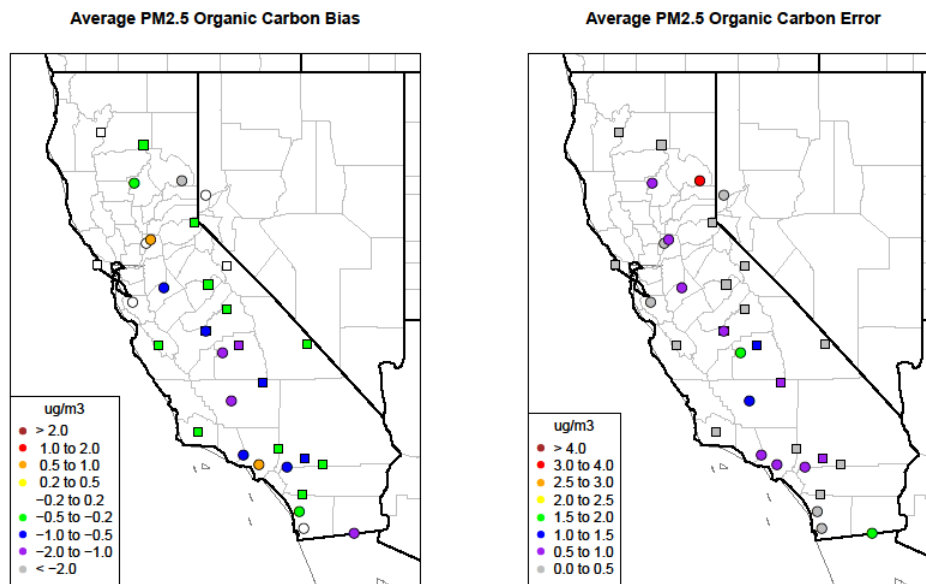

Average PM2.5 Organic Carbon Bias

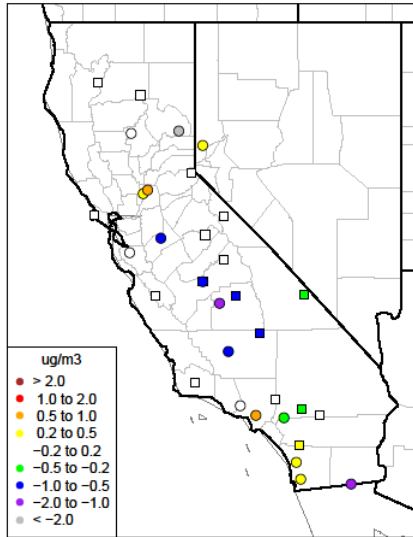

Average PM2.5 Organic Carbon Error

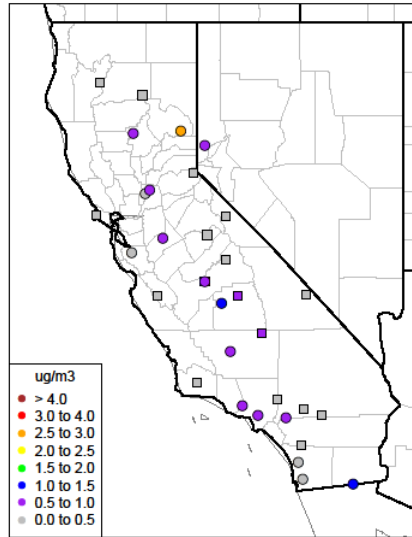

## 2 ADDITIONAL METHODS INFORMATION

### 2.1 Additional Information on Sampling and Analysis Methods

CalNex ground measurements took place in Pasadena, CA from 15 May – 15 June 2010 and in Bakersfield, CA from 15 May – 30 June 2010. Filter samples for SOA are integrated for 23-h periods starting at midnight of the designated sampling day. In total, there are 32 filter samples from Pasadena and 36 from the Bakersfield site. The sampling protocols have been described in detail elsewhere (Kleindienst, Lewandowski et al. 2010). PM<sub>2.5</sub> was collected on quartz filters using high volume PM<sub>2.5</sub> samplers operated at 0.226 m<sup>3</sup> min<sup>-1</sup>. Each sampler consists of a PM<sub>2.5</sub> inlet (Tisch Environmental, Cleves, OH) followed by a 90-mm pre-combusted quartz filter (Pall-Life Sciences, East Hills, NY). Organic carbon denuders were not used in-line for these samples.

For the analysis of the SOA tracer compounds, filters and field blanks were treated using the method described by Kleindienst et al. (Kleindienst, Jaoui et al. 2007). Filters were soxhlet extracted for 24 hours using 125 mL of a 1:1 (v/v) dichloromethane:methanol mixture. Prior to the extraction, cis-ketopinic acid and tetracosane-d<sub>50</sub> were added as internal standards. Filter extracts were rotary evaporated to a volume of 1 mL, then evaporated to dryness with ultrazero nitrogen. Extracts were derivatized with 250 µL BSTFA (1% TMCS catalyst) and 100 µL pyridine to give a final volume of 350 µL. The silylated extracts were analyzed by GC-ion trap mass spectroscopy (ITMS) in the methane-Cl mode. Further detailed aspects of the analytical methodology have been given by Jaoui et al. (Jaoui, Kleindienst et al. 2004).

The mass spectral analysis for the organic compounds used as secondary molecular tracers has been described (Edney, Kleindienst et al. 2003). The tracer compounds are grouped by major ion fragments (Kleindienst, Jaoui et al. 2007). Since standards do not exist for the majority of these compounds, the concentrations of all of the tracers were measured as ketopinic acid (KPA). GC-MS analysis for the tracer compounds was conducted using the total ion chromatogram (TIC) or, in cases where coelution or extremely weak signals occurred, by a selected ion technique. By this method, a factor is determined from laboratory samples of the non-co-eluted peaks that represent the fraction of

the five ion intensity to the total ion intensity for each tracer compound. The use of the five-ion-to-TIC calibration factor was found to give more consistent concentration estimates than found using a single ion.

The actual or simulated TIC area was then used to calculate the tracer concentrations as KPA. An assessment of the accuracy of this technique has been estimated as 60% for pinic and norpinic acids (Jaoui, Kleindienst et al. 2005), two compounds for which independent standards were produced. The technique should not introduce major uncertainties into the contribution estimates from the field data, since the same analytical procedures were used to establish the laboratory-based mass fractions, thus, compensating for systematic errors found in laboratory and field samples. For the determination of the total carbon, a 1.45 cm<sup>2</sup> punch was taken from a representative quartz filter and analyzed using the National Institute of Occupational Safety and Health (NIOSH) or thermal-optical transmittance (TOT) method, as described by Birch and Cary (Birch and Cary 1996). Values for OC were corrected for filter background levels. The minimum detect limit for the SOA tracer species is 0.1 ng/m<sup>3</sup>.

Canisters for volatile organic compound (VOC) analysis were also collected at the two sites. A total of 41 samples were collected at the Bakersfield site and 31 at Pasadena. Samples were collected in evacuated (ca. 1 atm below ambient pressure) 6-liter canisters using Entech CS1200 samplers. Attached to the CS1200 samplers were Entech TM1100 systems that consisted of a battery operated off/on valve activated by a timer control element. The valve was open for a 3-h collection during the 6:00 – 9:00 a.m. (local daylight time) period. The samples were analyzed by GC-FID and reported compounds were identified by a GC retention time index using a calibration table (CALTABLE) of 402 VOCs developed specifically for GC system. Compounds equal to or less than the detection limit of 0.05 ppbC were defined as zero for comparison presentation of paired experimental and modeled estimates.

## **2.1.2 References**



Birch, M. E. and R. A. Cary (1996). "Elemental carbon-based method for monitoring occupational exposures to particulate diesel exhaust." Aerosol Sci. Technol. **25**: 221-241.

Edney, E. O., T. E. Kleindienst, T. S. Conver, C. D. McIver, E. W. Corse and W. S. Weathers (2003). "Polar organic oxygenates in PM<sub>2.5</sub> at a southeastern site in the United States." Atmospheric Environment **37**(28): 3947-3965.

Jaoui, M., T. E. Kleindienst, M. Lewandowski and E. O. Edney (2004). "Identification and quantification of aerosol polar oxygenated compounds bearing carboxylic or hydroxyl groups. 1. Method development." Analytical Chemistry **76**(16): 4765-4778.

Jaoui, M., T. E. Kleindienst, M. Lewandowski, J. H. Offenberg and E. O. Edney (2005). "Identification and quantification of aerosol polar oxygenated compounds bearing carboxylic or hydroxyl groups. 2. Organic tracer compounds from monoterpenes." Environmental Science & Technology **39**(15): 5661-5673.

Kleindienst, T. E., M. Jaoui, M. Lewandowski, J. H. Offenberg, C. W. Lewis, P. V. Bhave and E. O. Edney (2007). "Estimates of the contributions of biogenic and anthropogenic hydrocarbons to secondary organic aerosol at a southeastern US location." Atmospheric Environment **41**(37): 8288-8300.

Kleindienst, T. E., M. Lewandowski, J. H. Offenberg, E. O. Edney, M. Jaoui, M. Zheng, X. A. Ding and E. S. Edgerton (2010). "Contribution of Primary and Secondary Sources to Organic Aerosol and PM<sub>2.5</sub> at SEARCH Network Sites." Journal of the Air & Waste Management Association **60**(11): 1388-1399.

## 2.2 CMAQ AE6 treatment for SOA presented by volatility and O:C ratio

Modeled organic aerosol species, semi-volatile partitioning gas phase analogs, and VOC precursors are matched with a volatility bin assignment based on saturation vapor pressure ( $C^*$ ) (Table S3).  $C^*$  values for semi-volatile and aerosol species are taken from (Carlton et al., 2010) and calculated for gas-phase VOCs based on (Pankow et al., 1994) (Table S3 and Equation S1). The saturation vapor pressure of sesquiterpenes has not been measured and bin assignment is somewhat arbitrary; sesquiterpenes are placed in the  $\log(C^*)=5$  bin, two bins lower than monoterpenes and four bins lower than isoprene. Model reference  $C^*$  values are translated to local conditions at each sampling location by employing the species-specific enthalpy of vaporization ( $\Delta H_{\text{vap}}$ ). Mass concentrations of gas-phase species were calculated from the CMAQ reported mixing ratios (ppb<sub>v</sub>):

$$C_i \left( \frac{\mu\text{g}}{\text{m}^3} \right) = X_i \frac{P}{RT} MW_i$$

[1]

Where  $X_i$  is the gas phase mixing ratio in ppb<sub>v</sub> for species  $i$ ,  $P$  and  $T$  are the location specific instantaneous pressure and temperature respectively,  $R$  is the ideal gas constant, and  $MW_i$  is the species molecular weight.

CMAQ predictions of organic material during CalNex are dominated by gas phase species. This is generally true and consistent with early measurements in California (Fraser et al., 1996). Episode average gas and particle organic carbon estimated by CMAQ for each ground site are shown in Figure S11 by saturation vapor pressure. Most of the carbon mass is either in the gas phase or non-volatile aerosol. Mass in the semi-volatile space is largely in the gas-phase. This suggests the potential exists for additional modeled SOC but this space is difficult to constrain due to limited available gas phase measurements. This Figure also shows gaps in the model representation of PM<sub>2.5</sub> organic carbon volatility distribution. Additional precursors with a saturation vapor pressure less than  $10^8 \mu\text{g}/\text{m}^3$  (such as IVOCs) could ameliorate some of the SOC under prediction (Shrivastava et al., 2008).

Smog chamber experiments conducted at high mass loadings and the SOC parameterizations developed from those experiments, and used in CMAQ, may be a contributing factor to the absence of material in low volatility bins, possibly due to bin mis-assignment (Stanier et al., 2008). It would also seem that some material mapped to the “non-volatile” bin actually exhibit some partitioning and

should be elsewhere in the distribution, i.e.,  $-4 < \log_{10} C^* < -1$ . Missing SOC from PAHs (the naphthalene tracer) would contribute organic material to bins 0 and 2 with an O:C ratio  $\sim 0.5$  (Chan et al., 2009b; Pye and Pouliot, 2012) and would not ameliorate the empty gaps. As noted previously, the modeling system does well at replicating total VOC but tends to underestimate aerosol carbon at these sites during this time period. For model applications requiring yields of species with saturation concentrations less than  $0.1 \mu\text{g}/\text{m}^3$ , experiments must be able to measure similarly low concentrations to provide robust parameters (Stanier et al., 2008).

### 2.2.1 References

- Carlton, A.G., Bhawe, P.V., Napelenok, S.L., Edney, E.O., Sarwar, G., Pinder, R.W., Pouliot, G.A., Houyoux, M., 2010. Treatment of secondary organic aerosol in CMAQv4.7. *Environmental Science and Technology* 44, 8553-8560.
- Chan, A.W.H., Kautzman, K.E., Chhabra, P.S., Surratt, J.D., Chan, M.N., Crounse, J.D., Kuerten, A., Wennberg, P.O., Flagan, R.C., Seinfeld, J.H., 2009. Secondary organic aerosol formation from photooxidation of naphthalene and alkylnaphthalenes: implications for oxidation of intermediate volatility organic compounds (IVOCs). *Atmospheric Chemistry and Physics* 9, 3049-3060.
- Fraser, M.P., Grosjean, D., Grosjean, E., Rasmussen, R.A., Cass, G.R., 1996. Air quality model evaluation data for organics .1. Bulk chemical composition and gas/particle distribution factors. *Environmental Science & Technology* 30, 1731-1743.
- Pankow, J.F., Isabelle, L.M., Buchholz, D.A., Luo, W.T., Reeves, B.D., 1994. Gas Particle Partitioning of Polycyclic Aromatic Hydrocarbons and Alkanes to Environmental Tobacco Smoke. *Environmental Science & Technology* 28, 363.
- Pye, H.O.T., Pouliot, G.A., 2012. Modeling the Role of Alkanes, Polycyclic Aromatic Hydrocarbons, and Their Oligomers in Secondary Organic Aerosol Formation. *Environmental Science & Technology*.
- Shrivastava, M.K., Lane, T.E., Donahue, N.M., Pandis, S.N., Robinson, A.L., 2008. Effects of gas particle partitioning and aging of primary emissions on urban and regional organic aerosol concentrations. *Journal of Geophysical Research: Atmospheres* (1984–2012) 113.

Stanier, C.O., Donahue, N.M., Pandis, S.N., 2008. Parameterization of secondary organic aerosol mass fractions from smog chamber data. *Atmospheric Environment* 42, 2276-2299.

**Table S3.** Calculation of volatility bin for gas phase organic species.

| Species Name   | Molecular Weight (g/gmol) | Vapor Pressure (mmHg) | Saturation Vapor Pressure (c*) | log(c*) | Note                               |
|----------------|---------------------------|-----------------------|--------------------------------|---------|------------------------------------|
| ISOP           | 68.12                     | 550                   | 2.05E+09                       | 9.31    |                                    |
| ALK2,ALK3,ALK4 | 57.6                      | 100                   | 3.15E+08                       | 8.50    | MW=average of 36.7, 58.6, and 77.6 |
| MGLY           | 108                       | 27                    | 1.60E+08                       | 8.20    | Hydrated methylglyoxal (higher MW) |
| MGLY           | 72.1                      | 27                    | 1.07E+08                       | 8.03    |                                    |
| TOLUENE        | 92.1                      | 20                    | 1.01E+08                       | 8.00    |                                    |
| GLY            | 92                        | 18                    | 9.06E+07                       | 7.96    | Hydrated glyoxal (higher MW)       |
| BENZENE        | 78                        | 20                    | 8.54E+07                       | 7.93    |                                    |
| GLY            | 58.1                      | 18                    | 5.72E+07                       | 7.76    |                                    |
| MXYL,OXYL,PXYL | 106.2                     | 7                     | 4.07E+07                       | 7.61    |                                    |
| TERP           | 136                       | 3.5                   | 2.61E+07                       | 7.42    |                                    |
| Napthalene     | 128.19                    | 0.087                 | 6.10E+05                       | 5.79    | Not included in CMAQv5.0.2         |
| SESQ           | 204                       | 0.01                  | 1.12E+05                       | 5.05    | Assumed vapor pressure             |
| ATRP2, SV_TRP2 |                           |                       | 1.34E+02                       | 2.13    | c* from Carlton et al, 2010        |
| AISO1, SV_ISO1 |                           |                       | 1.16E+02                       | 2.06    | c* from Carlton et al, 2010        |
| ABNZ2, SV_BNZ2 |                           |                       | 1.11E+02                       | 2.05    | c* from Carlton et al, 2010        |
| AXYL2, SV_XYL2 |                           |                       | 3.45E+01                       | 1.54    | c* from Carlton et al, 2010        |
| ASQT, SV_SQT   |                           |                       | 2.50E+01                       | 1.40    | c* from Carlton et al, 2010        |
| ATOL2, SV_TOL2 |                           |                       | 2.13E+01                       | 1.33    | c* from Carlton et al, 2010        |
| ATRP1, SV_TRP1 |                           |                       | 1.48E+01                       | 1.17    | c* from Carlton et al, 2010        |
| ATOL1, SV_TOL1 |                           |                       | 2.33E+00                       | 0.37    | c* from Carlton et al, 2010        |
| AXYL1, SV_XYL1 |                           |                       | 1.31E+00                       | 0.12    | c* from Carlton et al, 2010        |
| AISO2, SV_ISO2 |                           |                       | 6.17E-01                       | -0.21   | c* from Carlton et al, 2010        |
| ABNZ1, SV_BNZ1 |                           |                       | 3.02E-01                       | -0.52   | c* from Carlton et al, 2010        |
| AALK, SV_ALK   |                           |                       | 2.00E-02                       | -1.70   | c* from Carlton et al, 2010        |

**Equation S1.**

$$C_i^* = \frac{10^6 MW_i \xi_i p_{L,i}^o}{RT} = \frac{10^6 \left(\frac{\mu g}{g}\right) \times MW_i \left(\frac{g}{gmol}\right) \times \xi_i \times p_{L,i}^o (mmHG)}{62.36 \left(\frac{L mmHG}{K mol}\right) \times 293(K) \times \frac{m^3}{1000L}}$$

Note that  $\xi_i$  is assumed to be 1. This assumption is useful as an index for comparison among species but does not provide a complete description of the partitioning potential of water-soluble organic species.



**Table S4.** Comparison of O:C ratio estimated from the assigned OM:OC ratios and estimated by counting the number of carbon, oxygen and hydrogen atoms.

| Species | MW    | OM/OC | # of C<br>derived from<br>parent compound | # of O<br>integer dervied<br>from MW less<br>carbon mass | # of H<br>integer dervied from<br>MW less carbon &<br>oxygen mass | O:C<br>calculated from<br>suspected<br>chemical makeup | O:C<br>(OM/OC-1)*(3/4) |
|---------|-------|-------|-------------------------------------------|----------------------------------------------------------|-------------------------------------------------------------------|--------------------------------------------------------|------------------------|
| AISO1   | 96    | 1.6   | 5                                         | 2                                                        | 4                                                                 | 0.40                                                   | 0.45                   |
| AISO2   | 96    | 1.6   | 5                                         | 2                                                        | 4                                                                 | 0.40                                                   | 0.45                   |
| ABNZ1   | 144   | 2     | 6                                         | 4                                                        | 8                                                                 | 0.67                                                   | 0.75                   |
| ABNZ2   | 144   | 2     | 6                                         | 4                                                        | 8                                                                 | 0.67                                                   | 0.75                   |
| ABNZ3   | 144   | 2     | 6                                         | 4                                                        | 8                                                                 | 0.67                                                   | 0.75                   |
| AALK    | 150   | 1.56  | 8                                         | 3                                                        | 6                                                                 | 0.38                                                   | 0.42                   |
| AISO3   | 162   | 2.7   | 5                                         | 6                                                        | 6                                                                 | 1.20                                                   | 1.28                   |
| ATOL1   | 168   | 2     | 7                                         | 5                                                        | 4                                                                 | 0.71                                                   | 0.75                   |
| ATOL2   | 168   | 2     | 7                                         | 5                                                        | 4                                                                 | 0.71                                                   | 0.75                   |
| ATOL3   | 168   | 2     | 7                                         | 5                                                        | 4                                                                 | 0.71                                                   | 0.75                   |
| ATRP1   | 168   | 1.4   | 10                                        | 3                                                        | 0                                                                 | 0.30                                                   | 0.30                   |
| ATRP2   | 168   | 1.4   | 10                                        | 3                                                        | 0                                                                 | 0.30                                                   | 0.30                   |
| AOLGA   | 176.4 | 2.1   | 8                                         | 5                                                        | 0                                                                 | 0.63                                                   | 0.83                   |
| AORGC   | 177   | 2     | 3                                         | 8                                                        | 13                                                                | 2.00                                                   | 0.75                   |
| AXYL1   | 192   | 2     | 8                                         | 6                                                        | 0                                                                 | 0.75                                                   | 0.75                   |
| AXYL2   | 192   | 2     | 8                                         | 6                                                        | 0                                                                 | 0.75                                                   | 0.75                   |
| AXYL3   | 192   | 2     | 8                                         | 6                                                        | 0                                                                 | 0.75                                                   | 0.75                   |
| AOLGB   | 252   | 2.1   | 10                                        | 8                                                        | 4                                                                 | 0.80                                                   | 0.83                   |
| ASQT    | 378   | 2.1   | 15                                        | 12                                                       | 6                                                                 | 0.80                                                   | 0.83                   |

NOTE: This analysis is somewhat limited in its application to AOLGA, AOLGB and AORGC. AOLGA and AOLGB represent oligomerization with a potentially changing number of carbon atoms. AORGC represents carboxylic acid and high molecular weight compounds (max O:C of 2). The assigned MW of ATRP1, ATRP2, AXYL1, AXYL2, AXYL3 and AOLGA is not able to accommodate H atoms consistent with the assigned OM:OC ratios.

**Figure S12.** Episode average CMAQ organic mass plotted by saturation vapor pressure. Gaps in the distribution are associated with chemical properties that potentially provide insight regarding the identity missing organic aerosol mass noted in CMAQ predictions. Model baseline estimates shown on top row and sensitivity simulation on bottom row.

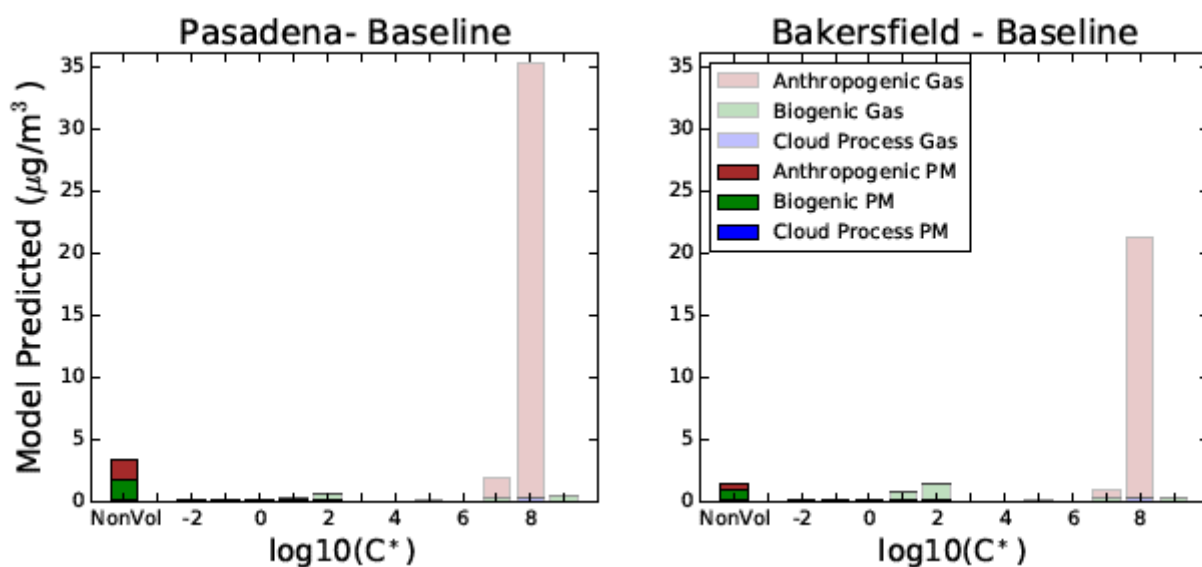



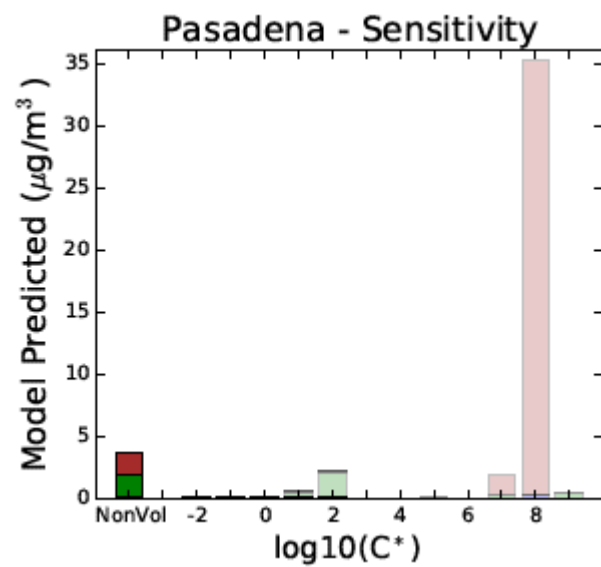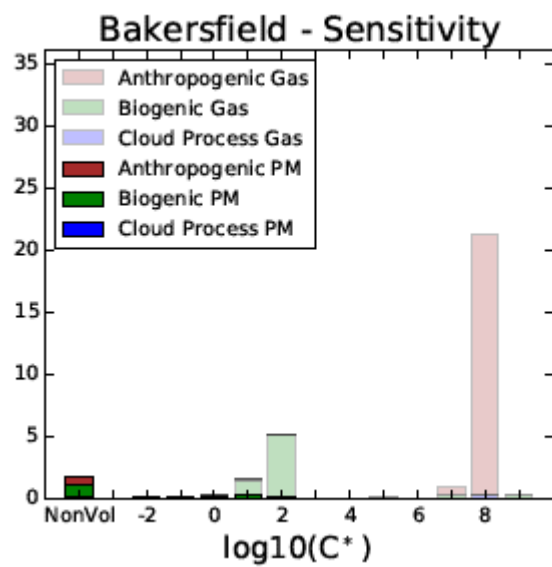

Supplement: Supplementary file 1 [file acp-15-5243-2015-supplement.pdf]
